# Supplementary material
Source: PubMed Central journal article supplement (PMC4277766)
Supplement: sb5002856_si_001.pdf [file sb5002856_si_001.pdf]

**Supplemental Information for Stanton *et al.***

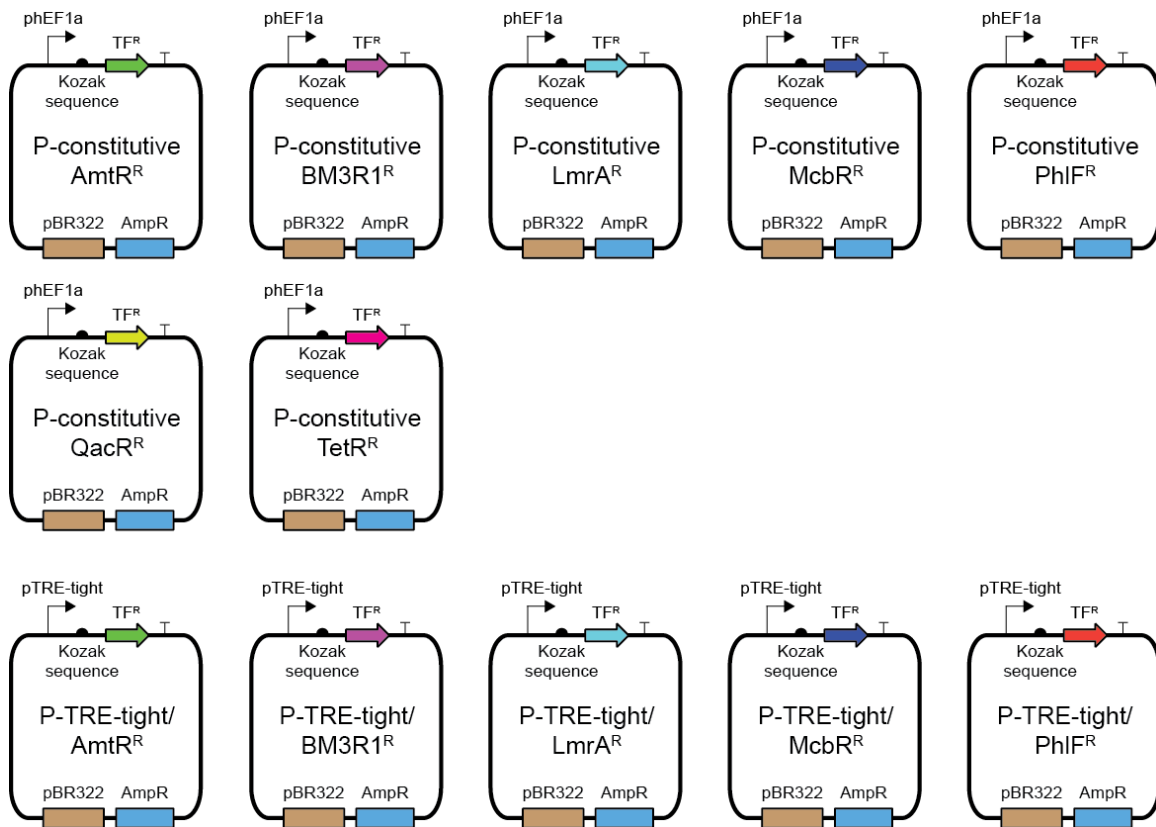

**Supplemental Figure 1. Repressor expression plasmids.** Both constitutive (top two panels) and inducible expression (bottom panel) vectors are illustrated for each repressor. In the case of the constitutively expressed repressors, expression is controlled by the hEF1a promoter, whereas inducible expression is mediated by either the TRE-tight promoter.

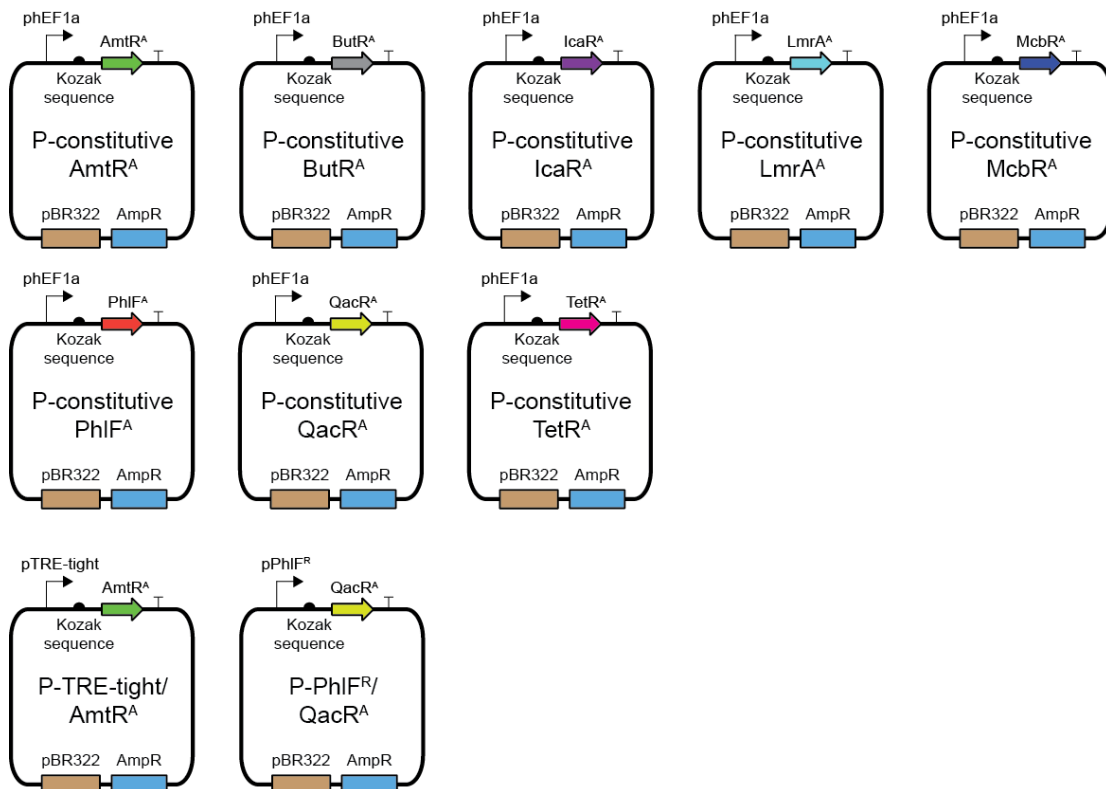

**Supplemental Figure 2. Activator expression plasmids.** Both constitutive (top two panels) and inducible expression (bottom panel) vectors are illustrated for each activator. In the case of the constitutively expressed activators, expression is controlled by the hEF1a promoter. Inducible expression is mediated by either the TRE-tight promoter (for the AmtR<sup>A</sup> gene), or the PhIF<sup>R</sup> promoter (for the QacR<sup>A</sup> gene).

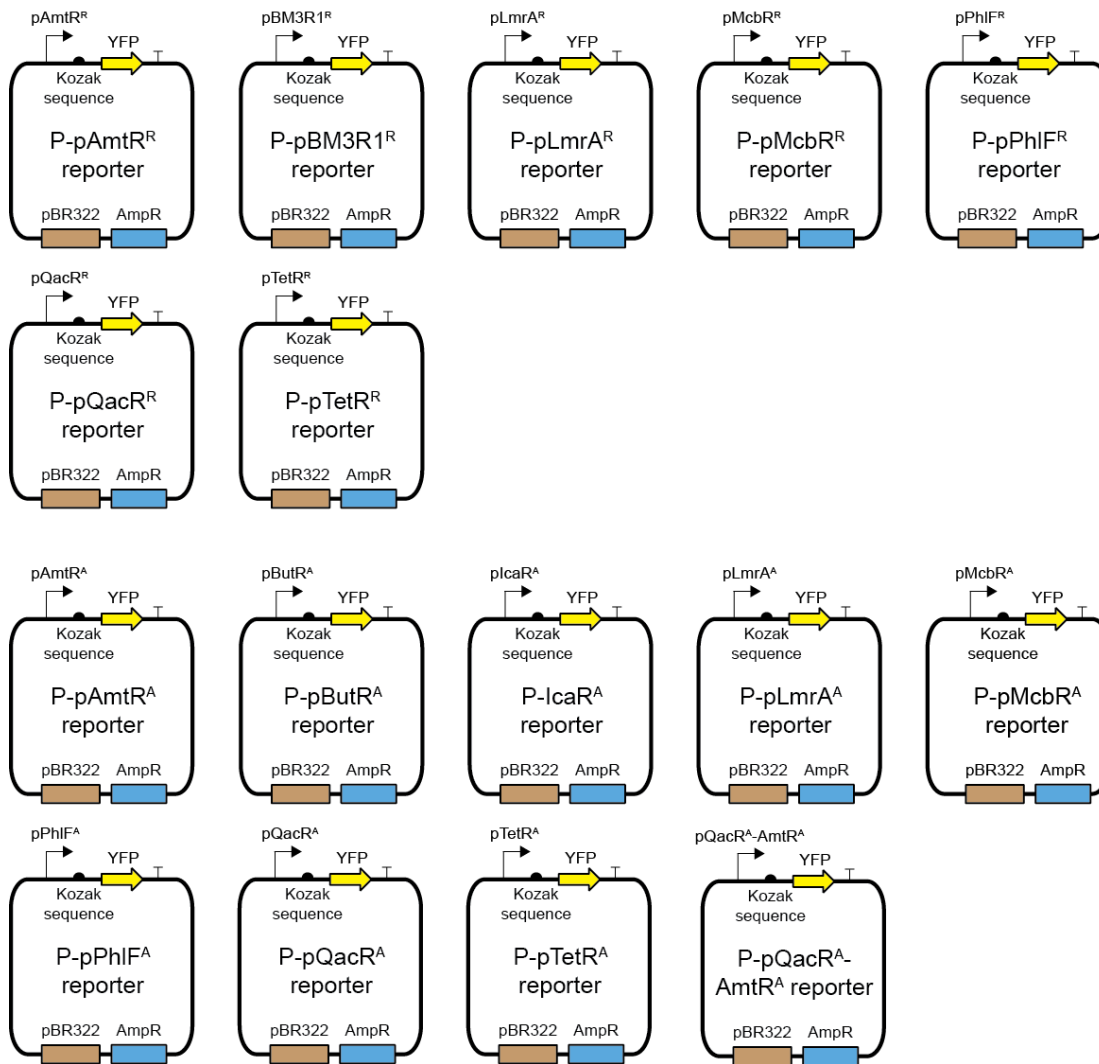

**Supplemental Figure 3. YFP reporter plasmids.** YFP reporter plasmids are illustrated for the repressors (top two panels) and activators (bottom two panels). In each case, YFP expression is controlled by the transcription factor indicated by the promoter. For the P-pQacR<sup>A</sup>-AmtR<sup>A</sup> reporter, expression is controlled in tandem by both the QacR<sup>A</sup> and AmtR<sup>A</sup> activators.

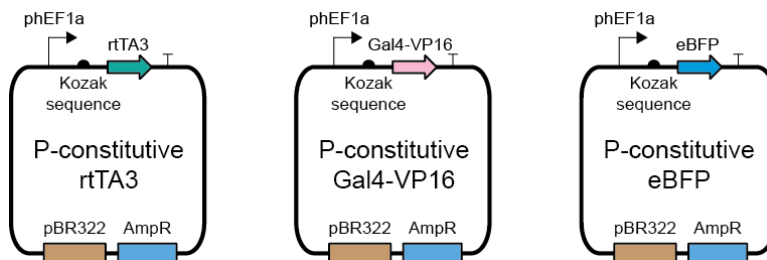

**Supplemental Figure 4. Constitutively expressed accessory and control plasmids.** Plasmid maps are illustrated for mammalian accessory and control plasmids for the rTA3 and Gal4-VP16 activators, as well as for the eBFP transfection control plasmid. In all cases, expression is controlled by the hEF1a promoter.

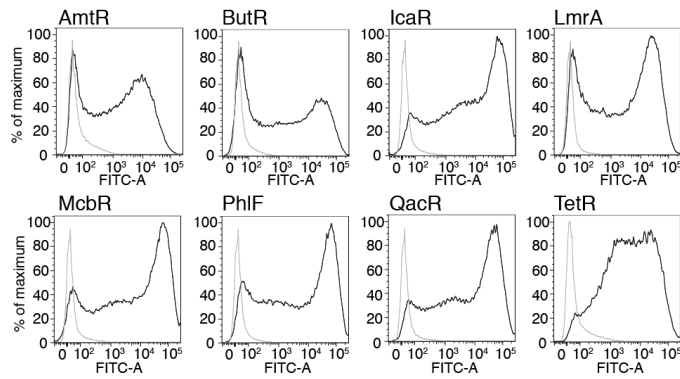

**Supplemental Figure 5: Activator fluorescence histograms.** Representative histograms of HEK cells transfected with the reporter only (grey peak) or cells co-transfected with the activator and reporter (black peak) are illustrated. The y-axis corresponds to the % maximum cells, while the x-axis details the FITC-A fluorescent signal in arbitrary units. Transfections contain the indicated YFP reporter plasmid, a plasmid constitutively expressing eBFP, and a plasmid constitutively expressing the cognate activator (present only in the case where the transfections correspond to the histograms colored in black). Histograms correspond to the microscopic images presented in Figure 1c.

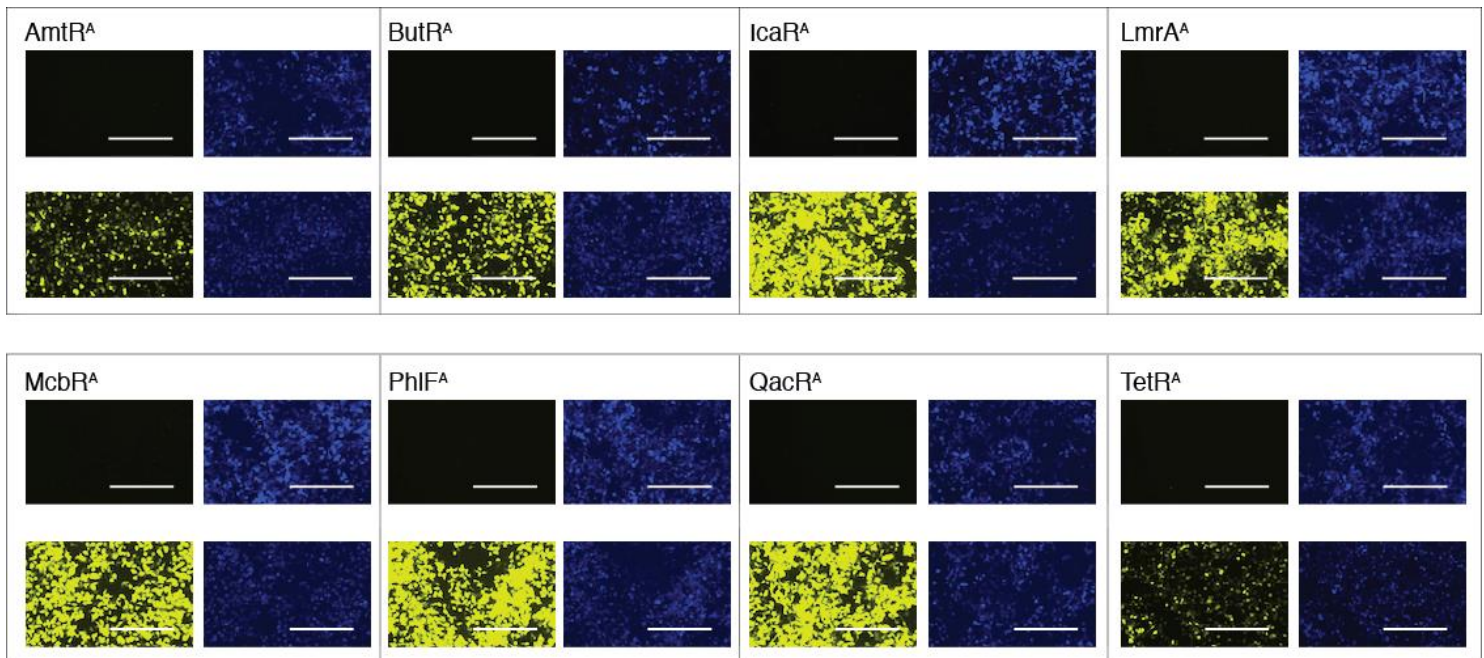

**Supplemental Figure 6: Microscopic fluorescent images of activators in HEK cells.** Microscopic images of cells transfected with the reporter only (top panel) or the co-transfected reporter and activator (bottom panel) are shown. For each activator, cells are visualized using a YFP filter (left panel) and a BFP filter (right panel, both 10x magnification). BFP serves as the transfection control; cells were co-transfected with a plasmid constitutively expressing eBFP. Images were taken 48 hours post-transfection. White bars correspond to 400  $\mu\text{m}$ .

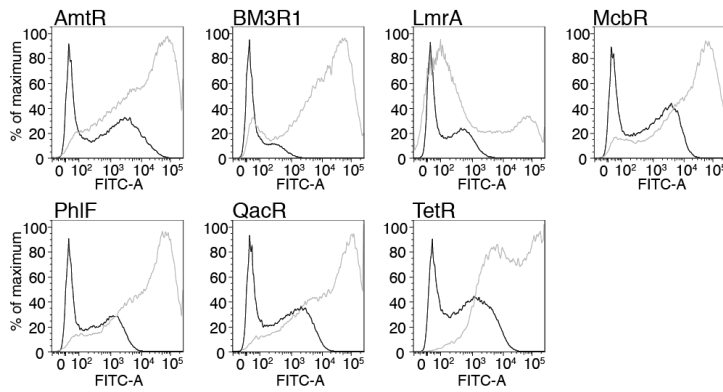

**Supplemental Figure 7: Repressor fluorescence histograms.** Representative histograms of HEK cells transfected with the reporter only (grey peak) or cells co-transfected with the repressor and reporter (black peak) are illustrated. The y-axis corresponds to the % maximum cells, while the x-axis details the FITC-A fluorescent signal in arbitrary units. Transfections contain the indicated YFP reporter plasmid, a plasmid constitutively expressing eBFP, a plasmid constitutively expressing the Gal4-VP16 fusion protein, and a plasmid constitutively expressing the cognate repressor (present only in the case where the transfections corresponding to the histograms colored in black). Histograms correspond to the microscopic images presented in Figure 1d.

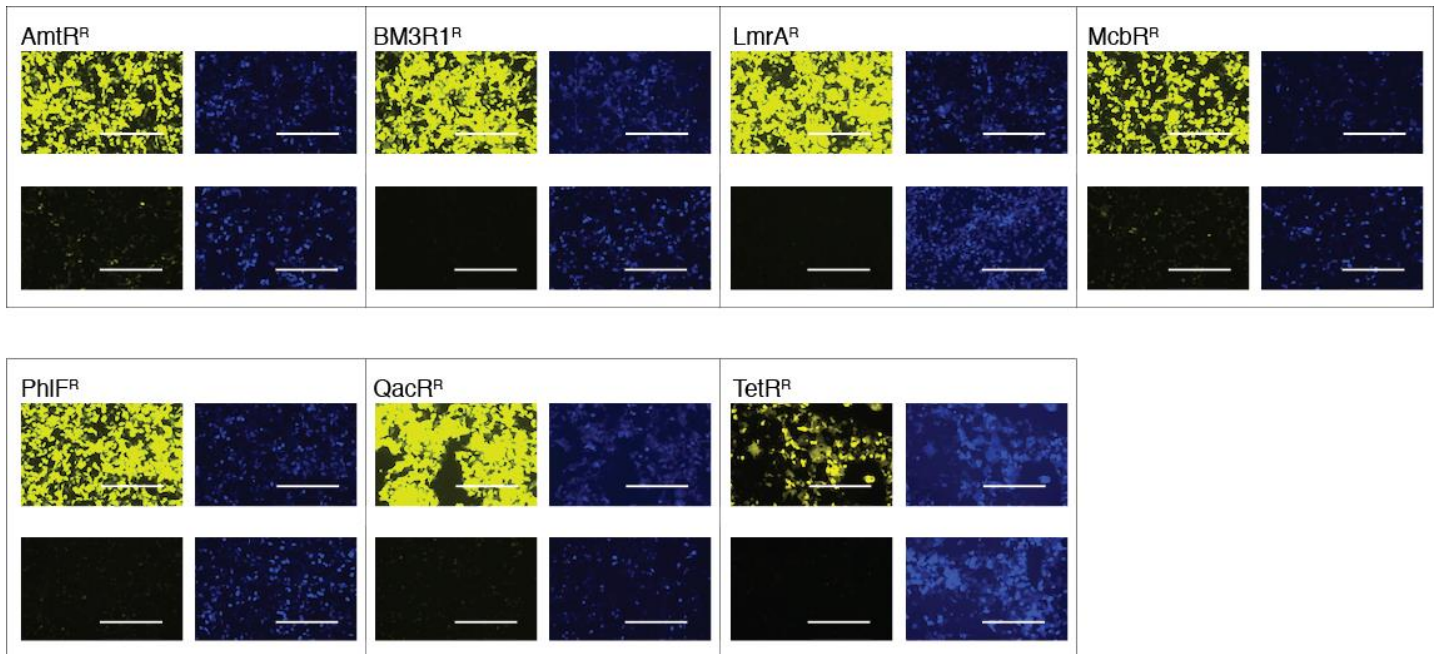

**Supplemental Figure 8: Microscopic fluorescent images of repressors in HEK cells.** Microscopic images of cells transfected with the reporter and Gal4-VP16 (top panel) or the co-transfected reporter, Gal4-VP16, and repressor (bottom panel) are shown. For each repressor, cells are visualized using a YFP filter (left panel) and a BFP filter (right panel, both 10x magnification). BFP serves as the transfection control; cells were co-transfected with a plasmid constitutively expressing eBFP. Images were taken 48 hours post-transfection. White bars correspond to 400  $\mu\text{m}$ .

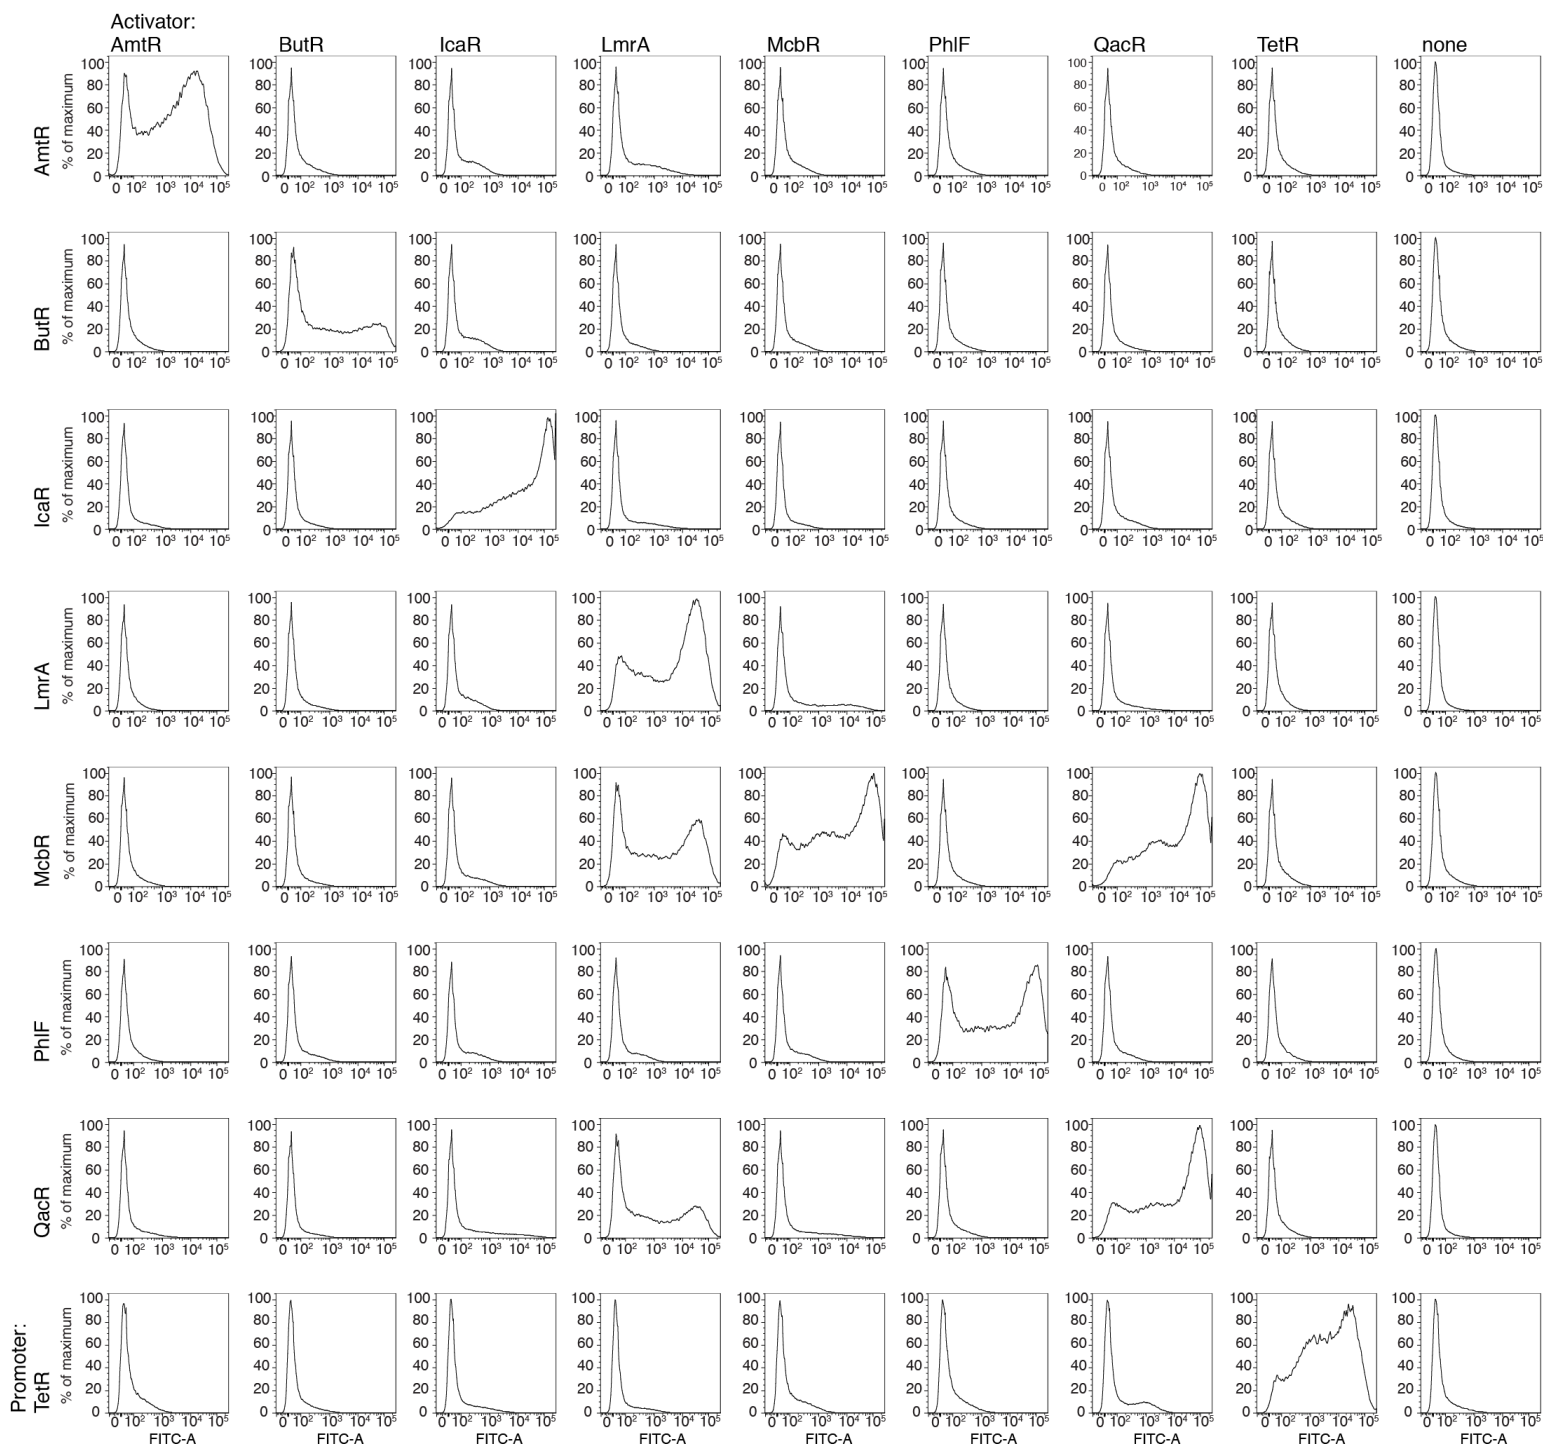

**Supplemental Figure 9. Activator orthogonality matrix histograms.** Representative histograms for HEK cells transfected with the indicated activator/promoter pair are illustrated. The y-axis corresponds to the % maximum cells, while the x-axis details the FITC-A fluorescent signal in arbitrary units. In all cases (except the right-most column), cells were transfected with the YFP reporter plasmid indicated, a plasmid constitutively expressing eBFP, and a plasmid constitutively expressing the indicated activator. The last column corresponds to cells transfected with the reporter and eBFP plasmids only. Histograms correspond to the matrix illustrated in Figure 2a.

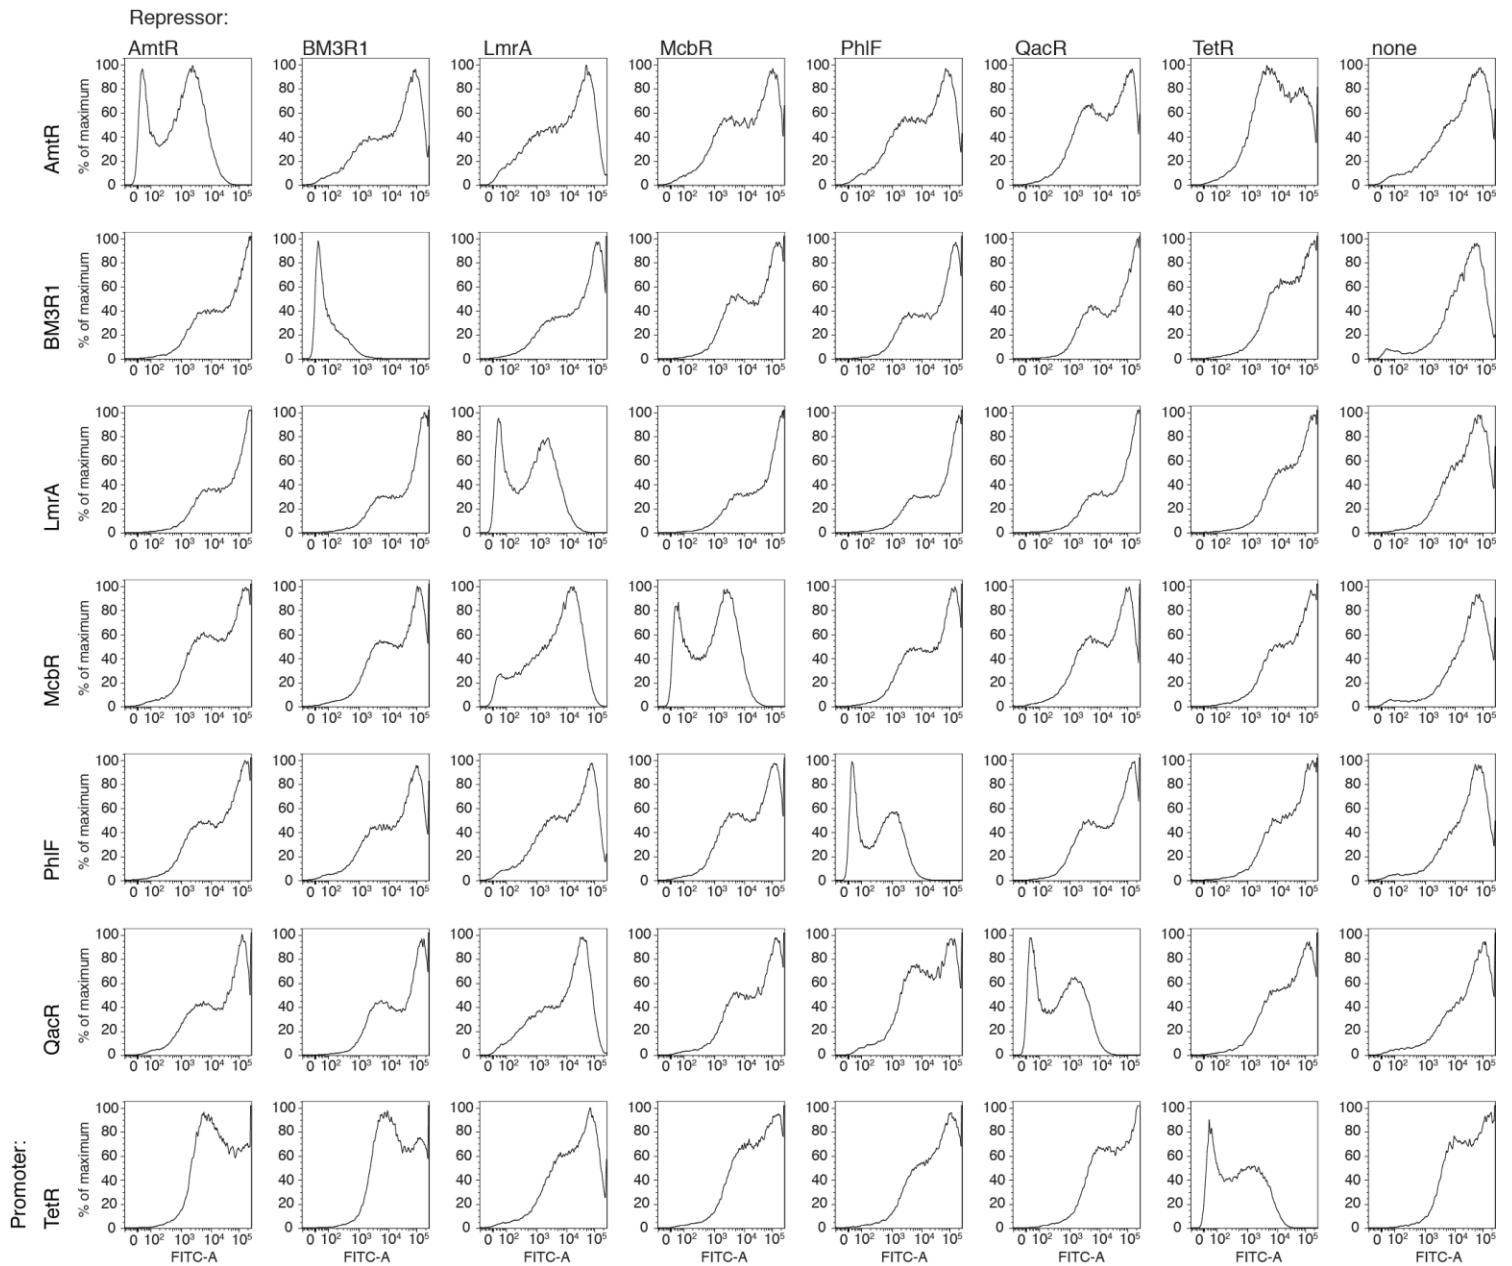

**Supplemental Figure 10. Repressor orthogonality matrix histograms.** Representative histograms for HEK cells transfected with the indicated repressor/promoter pair are illustrated. The y-axis corresponds to the % maximum cells, while the x-axis details the FITC-A fluorescent signal in arbitrary units. In all cases (except the right-most column), cells were transfected with the YFP reporter plasmid indicated, a plasmid constitutively expressing eBFP, a plasmid constitutively expressing the indicated repressor, and a plasmid constitutively expressing the Gal4-VP16 fusion protein. The last column corresponds to cells transfected with the reporter, eBFP, and Gal4-VP16 plasmids only. Histograms correspond to the matrix illustrated in Figure 2b.

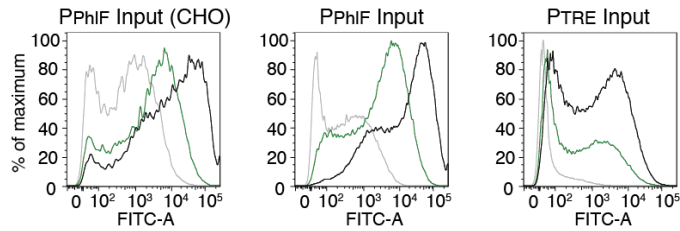

**Supplemental Figure 11. Inducible input promoter histograms.** Representative histograms for CHO cells (left panel) and HEK cells (middle and right panels) transfected with either the PhIF or TetR-inducible system are shown. The y-axis corresponds to the % maximum cells, while the x-axis details the FITC-A fluorescent signal in arbitrary units. Cells are transfected with a YFP-reporter plasmid, a plasmid constitutively expressing either the PhIF repressor or rtTA3 activator, a plasmid constitutively expressing eBFP, and a plasmid constitutively expressing a Gal4-VP16 fusion protein in the case of the PhIF-inducible system. Grey, green, and black histograms correspond to cells containing 0, 1, or 30  $\mu\text{M}$  DAPG, respectively (for the left and middle plots). Grey, green, and black histograms correspond to cells containing 0, 0.5  $\mu\text{M}$ , or 2  $\mu\text{M}$  Doxycycline, respectively (right plot). Histograms correspond to the curves illustrated in Figure 3b.

**Supplemental Table 1. Input promoter response curve parameters**

| Name                   | Cell line | $K$ | $n$ | $y_{max}$ | $y_{min}$ | Fold-Change |
|------------------------|-----------|-----|-----|-----------|-----------|-------------|
| P <sub>TRE</sub> -YFP  | HEK       | 0.1 | 1.4 | 1248.6    | 17.7      | 70.5        |
| P <sub>PhIF</sub> -YFP | HEK       | 1.4 | 4.7 | 13125     | 242.7     | 54.1        |
| P <sub>PhIF</sub> -YFP | CHO       | 4.9 | 1   | 4983.8    | 342.4     | 14.6        |

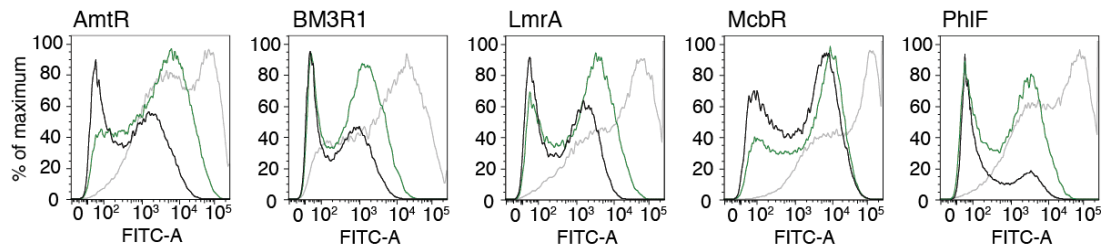

**Supplemental Figure 12. Repressor induction curve histograms.** Representative histograms for HEK cells transfected with Doxycycline-inducible repressors including AmtR, BM3R1, LmrA, McbR, and PhIF are illustrated. The y-axis corresponds to the % maximum cells, while the x-axis details the FITC-A fluorescent signal in arbitrary units. Cells were transfected with the YFP-reporter plasmid indicated, a plasmid constitutively expressing the rtTA3 activator, a plasmid constitutively expressing eBFP, a plasmid expressing the P<sub>TRE</sub> repressor indicated, and a plasmid constitutively expressing the Gal4-VP16 fusion protein. Grey, green, and black histograms correspond to cells containing 0, 0.5  $\mu\text{M}$ , or 5  $\mu\text{M}$  Doxycycline, respectively. Histograms correspond to the curves illustrated in Figure 4b.



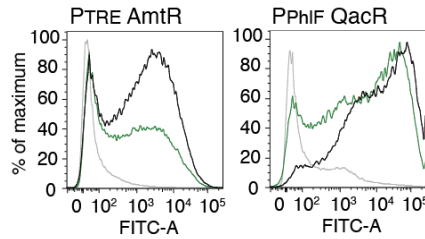

**Supplemental Figure 13. Activator induction curve histograms.** Representative histograms for HEK cells transfected with either the Doxycycline-inducible AmtR (left) or the DAPG-inducible QacR (right) activators are illustrated. The y-axis corresponds to the % maximum cells, while the x-axis details the FITC-A fluorescent signal in arbitrary units. Cells were transfected with the YFP-reporter plasmid indicated, a plasmid constitutively expressing the rtTA3 activator (left histogram only), a plasmid constitutively expressing eBFP, a plasmid expressing the inducible activator indicated, a plasmid constitutively expressing the PhIF repressor (right histogram only), and a plasmid constitutively expressing the Gal4-VP16 fusion protein (right histogram only). Grey, green, and black histograms correspond to cells containing 0, 0.05, or 5  $\mu\text{M}$  Doxycycline (left panel) respectively, or 0, 1, or 30  $\mu\text{M}$  DAPG respectively (right panel). Histograms correspond to the curves illustrated in Figure 4d.

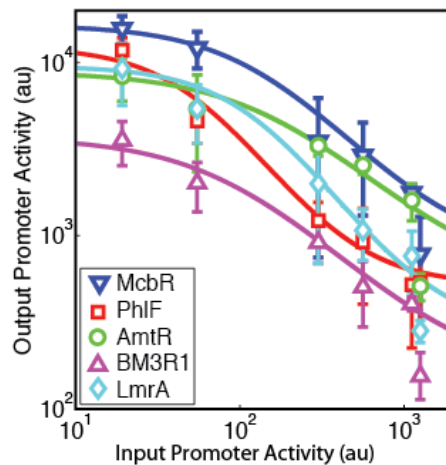

**Supplemental Figure 14. Renormalization of NOT gates based on promoter activity.** The data for each NOT gate was fit using the hill equation, where values along the x-axis were modified into units of promoter activity.

**Supplemental Table 2. Transcription factor response curves parameters (REU)**

| Name               | Inducer | $K$   | $n$  |
|--------------------|---------|-------|------|
| McbR <sup>R</sup>  | Dox     | 6.21  | 0.64 |
| PhIF <sup>R</sup>  | Dox     | 5.79  | 1.05 |
| AmtR <sup>R</sup>  | Dox     | 22.88 | 0.67 |
| BM3R1 <sup>R</sup> | Dox     | 7.13  | 0.67 |
| LmrA <sup>R</sup>  | Dox     | 6.08  | 0.61 |
| AmtR <sup>A</sup>  | Dox     | 0.12  | 1.37 |
| QacR <sup>A</sup>  | DAPG    | 2.06  | 1.44 |

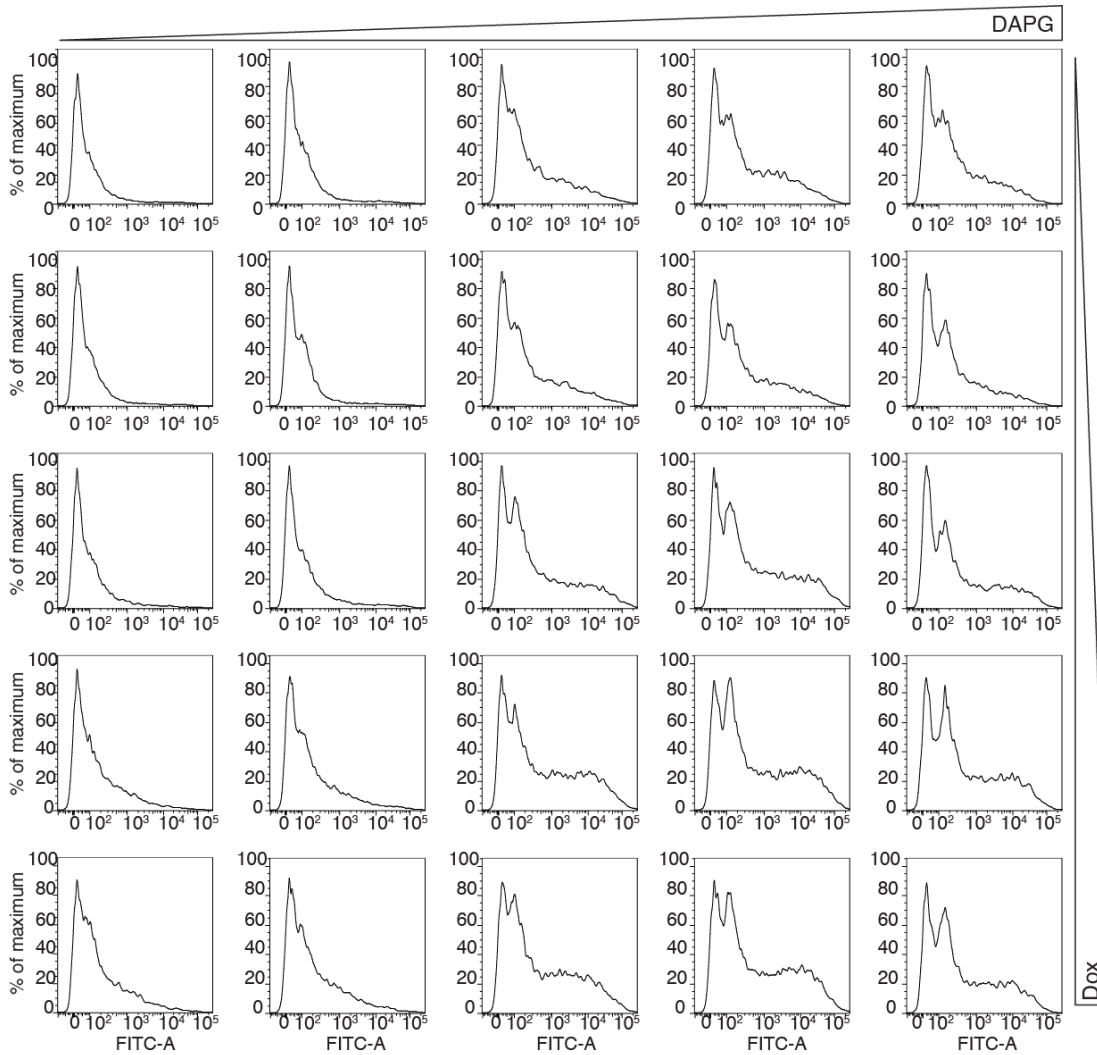

**Supplemental Figure 15. Synthetic enhancer fluorescent histograms.** Representative histograms for HEK cells transfected with the Doxycycline-inducible AmtR activator, the DAPG-inducible QacR activator, and the corresponding hybrid reporter are illustrated. The y-axis corresponds to the % maximum cells, while the x-axis details the FITC-A fluorescent signal in arbitrary units. Cells were transfected with the hybrid YFP-reporter plasmid, a plasmid constitutively expressing rTA3, a plasmid constitutively expressing eBFP, a plasmid expressing the AmtR inducible activator, a plasmid expressing the QacR inducible activator, a plasmid constitutively expressing the PhIF repressor, and a plasmid constitutively expressing the Gal4-VP16 fusion protein, for a total of 7 plasmids per transfection. From left to right across each column, DAPG concentrations correspond to 0, 0.1, 1, 10, and 30 μM DAPG. From top to bottom down each row, Doxycycline concentrations correspond to 0, 0.002, 0.02, 0.2, and 2 μM Doxycycline.

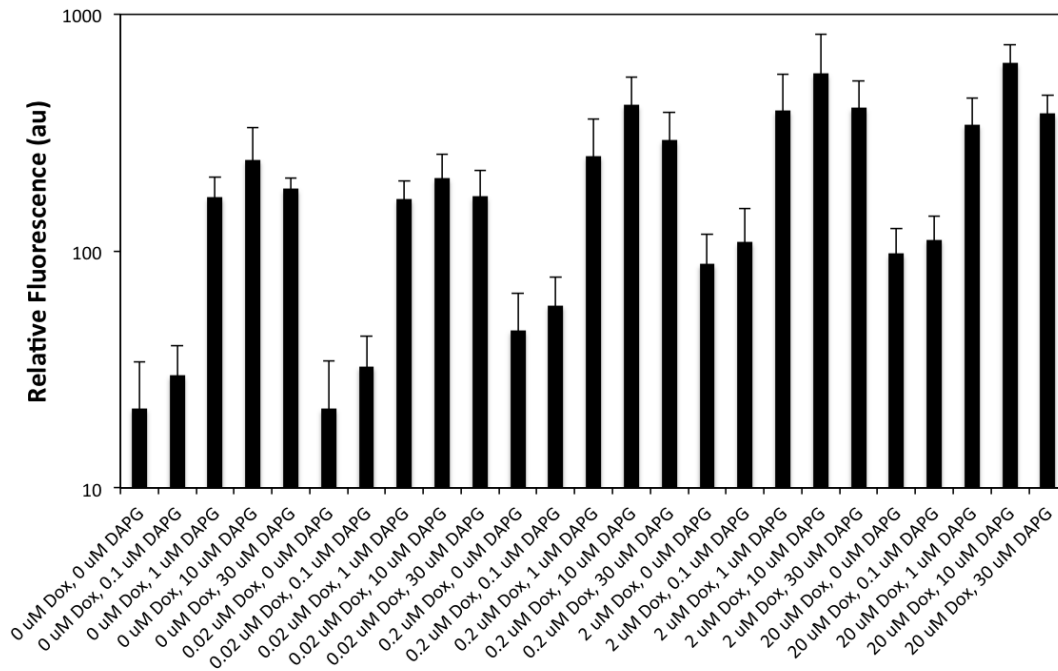

**Supplemental Figure 16. Synthetic enhancer standard deviation.** The relative fluorescence of cells containing varying inducers is illustrated. Data correspond to the average FITC-A geometric mean values obtained from flow cytometry of three transfections performed on different days. Error bars are based on the standard deviation of these three independent replicates.

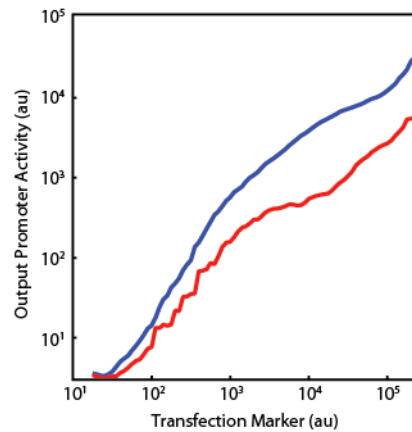

**Supplemental Figure 17. Comparison between copy number and output promoter activity.** The activation of the output promoter for the Fuzzy AND gate present in Figure 4e and 4f is illustrated under non- and maximal inducing conditions, and is shown as a function of transfection efficiency. Each curve illustrates the moving average of bins for the different transfection efficiencies for both uninduced (blue) and fully induced (red, 20  $\mu$ M Doxycycline and 30  $\mu$ M DAPG) conditions.

**Supplemental Table 3. Mammalian Part Sequences**

| Part                                 | Sequence                                                                                                                                                                                                                                                                                                                                                                                                                                                                                                                                                                                                                                                                                                                                                                                                                                                                                                                                                                                                                                                                                                                                                                                                                                                                                                                                                                                                                                                                         |
|--------------------------------------|----------------------------------------------------------------------------------------------------------------------------------------------------------------------------------------------------------------------------------------------------------------------------------------------------------------------------------------------------------------------------------------------------------------------------------------------------------------------------------------------------------------------------------------------------------------------------------------------------------------------------------------------------------------------------------------------------------------------------------------------------------------------------------------------------------------------------------------------------------------------------------------------------------------------------------------------------------------------------------------------------------------------------------------------------------------------------------------------------------------------------------------------------------------------------------------------------------------------------------------------------------------------------------------------------------------------------------------------------------------------------------------------------------------------------------------------------------------------------------|
| VP16                                 | <b>GCCCTCCACCAGATGTGTCCCTGGGAGATGAGCTGCACCTGGACGGCAGGACGTGGCAATGGCCCATGCCGACGCTCTGGACGACTTCGACCTGGACATGCTGGGCGACGGCGATAGCCCTGGCCCTGGCTTCACACCCACGACTCTGCCCTTACGGCGCCCTGGACATGGCCGACTTCGAGTTCGAGCAGATGTTACCCGACGCACTGGGCATCGACGAGTACGGCGGA</b>                                                                                                                                                                                                                                                                                                                                                                                                                                                                                                                                                                                                                                                                                                                                                                                                                                                                                                                                                                                                                                                                                                                                                                                                                                    |
| DD-tag                               | <b>ATGGGAGTGCAGGTGGAGACCAFCAGCCAGGAGATGGCAGGACATTCGCCAAGCCGGGGCAGACTTGCCTGGTGCACACACCGGCATGCTGGAGAGACGGGAAGAAAGTGGATAGCTCCAGGGACCGCAACAAGCCCTCAAGTTCATGCTGGGAAAGCAGGAAGTGGATCCGCGGGTGGGAGGAAGGAGTGGCCAGATGAGTGTGGGCGAGCGGGCTAAACTGACTATTTCACTGACTACGGCTATGGAGCTACCGGCAACCGGGATCAITCCCCTCAFGCCACCTGGTGTTCGATGTPGGAGCTGCTGAAGCCAG</b>                                                                                                                                                                                                                                                                                                                                                                                                                                                                                                                                                                                                                                                                                                                                                                                                                                                                                                                                                                                                                                                                                                                                              |
| NES                                  | <b>GGTGTAGCACTAAATTAGCTGGTTTGGACATAGGCGGG</b>                                                                                                                                                                                                                                                                                                                                                                                                                                                                                                                                                                                                                                                                                                                                                                                                                                                                                                                                                                                                                                                                                                                                                                                                                                                                                                                                                                                                                                    |
| NLS                                  | <b>CCCCCAAGAAAAGCGGAAAGTG</b>                                                                                                                                                                                                                                                                                                                                                                                                                                                                                                                                                                                                                                                                                                                                                                                                                                                                                                                                                                                                                                                                                                                                                                                                                                                                                                                                                                                                                                                    |
| Gal4-VP16                            | ATGAGCGAGCTGATTAAGGAGAACATGCACATGAAGCTGTACATGGAGGGCACCCTGGACAACCATCACTTCAAGTGCACATCCGAGGGCGAAGGAAGCCCTACGAGGGCACCCAGACCATGAGAATCAAGGTGTCGAGGGCGGCCCTTCCCCTTCGCTTCGACATCTGGCTATAGCTTCCCTACGGCAGCAAGACCTTCATCAACCACCCAGGGCATCCCGCAGCTTCTTCAAGCAGTCCCTCCCTGAGGGCTTCCATGCGGAGAGCTACCACATACGAAAGCGGGCGTGTGACCTGCCGTAACCGCTACCCAGGACACCAGCCCTCCAGGAGGCTGCTTCACTACAACGTCAAGATCAGAGGGGTGAACCTTACATCCAACGGCCCTGTGATGTCAGAAAGAAACACTCGGCTGGGAGGCCCTCACCCGAGACCTGTACCCGCTGACGGCGCCCTGGAAGGCAGAAACGACATGGCCCTGAAGCTCGTGGGCGGGAGCCATCTGATCGAAACATCAAGACCACATATAGATCCAAGAACCCCGCTAAGAACCTCAAGATGCTGCGCTGCTACTATGTGGACTACAGACTGGAAAGAATCAAGGAGGCCAACACGAGACCTACGTGAGCAGACAGAGGTGGCAGTGGCCAGATACTGCGACCTCCCTAGCAAACTGGGGCAGGGATCTGGCCGCCAACCACTCTCTGTGTAAGCAGGGCCGCGACGTGGAGGAGAACCCAGGCCATCTAGAATG <b>CCCCCCGACCGATGTCAGCCTGGGGACGAGCTCCTAGACGGCGGAGGACGTGGCGATGGCGCATGCCGACGGCTAGACGATTTTCGATCTGGACATGTTGGGGGACGGGGATTCCCGGGTCCCGGGATTTACCCCCACGACTCCCGCCCTACGGCGCTCTGGATATGGCCGACTTCGAGTTTGGAGCAGATGTTTACCGATGCCCTTGAATGACGAGTACGGTGGG</b> ACGCGTATGAAGCTACTGTCTTCTATCGAACAAGCATGCGATATTTGCCGACTTAAAAGCTCAAGTGTCCAAAGAAAACCCGAAGTGCGCCAAGTGTCTGAAGAACACTGGGAGTCTGCTACTCTCCCAAAACAAAAGGTCTCCGCTGACTAGGCACATCTGACAGAAGTGGAAATCAAGGCTAGAAAGACTGGAACAGCTATTTCTACTGATTTTTCTCGAGAAAGACCTTGACATGATTTGAAAATGGATTTTACAGGATATAAAAGCAATGTTAACAGGATTTTGTACAAGATAATGTGAATAAGATGCCCTACAGATAGATTTGGCTTCAGTGAGACTGATATGCCCTTCAACATTTAGACAGCATAGAATAAGTGCACATCATCGGAAAGAGCTAGTATAACAAAGTCAAAAGACAGTTGACTGTATAA |
| rTA3                                 | ATGTCTAGGCTGGACAAGAGCAAAAGTCATAAACCGAGCTCTGGAATTACTCAATGGTGTCCGATTCGAAGGCCCTGACGACAAGGAAACTCGCTCAAAGCTGGGAGTTGAGCAGCCTACCTGTACTTGGCAGCTGAAGAACAAGCGGCCCTGCTCGATGCCCTGCCAATCGAGATGCTGGACAGGCATATACCACCTTCTGCCCCCTGGAAAGCGAGTCAATGGCAAGACTTTCTGCGGAACAACGCCAAGTCAATACCCTGTGCTCTCCTCTCACATCGCGACGGGGCTAAAGTGCATCTCGGCACCCGCCAACAGAGAAACAGTACGAAACCCTGGAAAATCAGCTCGCGTTCCGTGTGCAGCAAGGCTTCTCCCTGGAGAACGCACTGTACGCTCTGTCCCGCTGGGCCACTTTACACTGGGCTGCGTATTGGAGGAACAGGAGCATCAAGTAGCAAAAAGAGGAAAGAGACACCTACCACCGATTTCTATGCCCCACTTCTGAGACAAGCAATTGAGCTGTTTCGACCGGACGGGACCGCAACCTGCCCTTCTTTCCGCTTGAAGTCAATCATATGTGGCCCTGGAGAAACAGCTAAAGTGCAGAAAGCGGGCGGCCGACCGACCTTTGACCTTAGACATGCTCCAGCGGATGCCCTTGGACTTTTGGACGATTTTGGACATGCTCCCGGGTAA                                                                                                                                                                                                                                                                                                                                                                                                                                                                                                                                                                                                                                                                                                                                                      |
| pCMV mini                            | <b>AGGCGTGTACGGTGGGAGGCCATATAAGCAGAGCTCGTTTAGTGAACCGTACAGT</b>                                                                                                                                                                                                                                                                                                                                                                                                                                                                                                                                                                                                                                                                                                                                                                                                                                                                                                                                                                                                                                                                                                                                                                                                                                                                                                                                                                                                                   |
| 5X-Gal4 binding sites                | <b>CGGAGTACTGTCTCCGAGCGGAGTACTGTCTCCGAGCGGAGTACTGTCTCCGAGCGGAGTACTGTCTCCGAGCGGAGTCTGTCTCCGAGCGGAGTCTGTCC</b>                                                                                                                                                                                                                                                                                                                                                                                                                                                                                                                                                                                                                                                                                                                                                                                                                                                                                                                                                                                                                                                                                                                                                                                                                                                                                                                                                                     |
| pHEF1a                               | TTGGCTCCGGTCCCGCTCAGTGGGACGAGCGACATGCCCAACAGTCCCGGAGAAGTGTGGGGAGGGGTGCGCAATTGAACCGGTGCC TAGAGAAGGTGGCGGGGTAACCTGGAAAGTGCATGCTGACTGGCTCCGCTTTTCCCGAGGGTGGGGGAGAACCGTATATAAGTGCAGTAGTCCCGTGAACGTTCTTTTCGCAACGGGTTTGGCCGAGAACACAGGTAAGTCCCGTGTGGTTCGCGGGCCCTGGCCCTCTTTACGGGTTATGGCCCTTGGCTGCTTGAATTACTTCCACTGCTGACGATGATTTTGAATCCCGAGCTTCGGGTTGGAAGTGGGTGGGAGGTTCCGAGCCCTTGGCTTAAAGAGCCCTTCCGCTGCTGTGAGTTGAGGCTGGCCCTGGGCGTGGGGCCCGCCGTCGCAATCTGGTGCACCTTCCGCGCTTCTCGCTGCTTTCGATAAGTCTCTAGCCATTTAAAATTTTTGATGACTGCTGGCAGCTTTTCTTCTGGCAAGATAGTCTTGTAAATGCGGGCAAGATCTGCACACTGGTATTTCCGTTTTTGGGGCCGCGGGCGGCACGGGGCCCGTGGCTCCAGCCACATGTTCCGGCAGGGCGGGCTGCGAGCGGGCCACCAGAAATCGGACGGGGTAGTCTAAGCTGGCCGGCCGTCTGGTGCCTGGCCCTCGCGCCCGGTATCGCCCGCCCTGGGCGCAAGGCTGGCCCGTCCGACCCAGTTCGCTGAGCGGAAAGATGGCCGCTTCCCGGCCCTGCTGCAGGGAGCTCAAATGGAGGACGCGCGCTCGGGAGAGCGGGCGGGTGGATCACCCACAAAGGAAAAGGGCTTTCCGCTCCTCAGCCGCTCATGTGACTCCAGGAGTACGGGGCCGCTCCAGGCACTCGATTAGTCTCAGACTTTTGAGTACGTCGTTTTAGGTTGGGGGAGGGGTTTTATCGATGGAGTTTCCCAACTGAGTGGGTGGAGACTGAAGTTAGCCAGCTTGGCACTTGATGAATTCCTTGAATTTGCCCTTTTTGAGTTGGATCTTGGTTCATTTCAAGCCTCAGACAGTGGTTCAAAGTTTTTCTTCCATTTACAGT                                                                                                                                                                                                                                                                                                                                  |
| pTRE-tight                           | TCCCTATCAGTGATAGAGAACGATGTCGAGTTTACTCCCTATCAGTGATAGAGAACGATGTCGAGTTTACTCCCTATCAGTGATAGAGA AACGATGTCGAGTTTACTCCCTATCAGTGATAGAGAACGATGTCGAGTTTACTCCCTATCAGTGATAGAGAACGATGTCGAGTTTACTCCCTATCAGTGATAGAGAACGATGTCGAGGTT <b>AGGCGTGTACGGTGGGAGGCCATATAAGCAGAGCTCGTTTAGTGAACCGTACAGT</b> CGC                                                                                                                                                                                                                                                                                                                                                                                                                                                                                                                                                                                                                                                                                                                                                                                                                                                                                                                                                                                                                                                                                                                                                                                            |
| pQacR <sup>+</sup> -Amr <sup>A</sup> | TTCATCGATCTATAGATAATGATTTCTATCGATCTATAGATAATCATTTCTATCGATCTATAGATAATCATATAGACCGTGCATCGG TCTATAGTTATAGACCGTGCATCGGCTATAAGTATAGACCGTGCATCGGCTATACGGGTCTCAGTACGTT <b>AGGCGTGTACGGTGG</b>                                                                                                                                                                                                                                                                                                                                                                                                                                                                                                                                                                                                                                                                                                                                                                                                                                                                                                                                                                                                                                                                                                                                                                                                                                                                                            |
| eYFP                                 | ATGGTGAGCAAGGGCGAGGAGCTGTTACCGGGGTGGTGCCTATCCTGGTTCGAGCTGGACGGCAGCTAAACGGCCACAAGTTCAGCGT GTCCGGCGAGGGCGAGGGCGATGCCACCTACGGCAAGCTGACCCCTGAAGTTTATCTGCACCACCGCAAGCTGCCCGTGCCTGGCCCA CCTTCGTGACCACTTCGGCTACGGCTGCAGTGTCTGCGCCATACCCGACCCACATGAAGCAGACGACTTCTTCAAGTCCAGCTATG CCGAAGGCTACGTCCAGGAGCGACCATCTTCTTCAAGGACGACGGCAACTACAAGACCCGCGCCGAGGTGAAGTTTCGAGGGCGACAC CTTGGTGAACCCGATCGAGCTGAAGGCATCGACTTCAAGGAGGACGGCAACATCTGGGGCACAAGCTGGAGTACAACACTACAACAGCC ACAACGCTATATCATAGCCGACAAGCAGAAACGGCATCAAGTGAACCTCAAGATCCGCCACAACATCGAGGAGGGCAGCGTGCAG CTGCGGACCACTACCAGCAGAACCCCATCGGCGACGGCCCGTGTGCTGCGCGACAACCACTACCTGAGCTACCAGTCCAAGCT GAGCAAGACCCCAACGAGAAGCGGATCACATGGTCTGCTGGAGTTCGTGACCCGCGCGGGATCACTCTCGGCATGGACGAGCTGT ACAAGTAA                                                                                                                                                                                                                                                                                                                                                                                                                                                                                                                                                                                                                                                                                                                                             |

|                          |                                                                                                                                                                                                                                                                                                                                                                                                                                                                                                                                                                                                                                                                                                                                                                                                                                                                                                                                                                                                                                                                                                                                                                                                                                                                                                                                                                                                                                                                                                               |
|--------------------------|---------------------------------------------------------------------------------------------------------------------------------------------------------------------------------------------------------------------------------------------------------------------------------------------------------------------------------------------------------------------------------------------------------------------------------------------------------------------------------------------------------------------------------------------------------------------------------------------------------------------------------------------------------------------------------------------------------------------------------------------------------------------------------------------------------------------------------------------------------------------------------------------------------------------------------------------------------------------------------------------------------------------------------------------------------------------------------------------------------------------------------------------------------------------------------------------------------------------------------------------------------------------------------------------------------------------------------------------------------------------------------------------------------------------------------------------------------------------------------------------------------------|
| eBFP                     | ATGAGCGAGCTGATTAAGGAGAACATGCACATGAAGCTGTACATGGAGGGCACCGTGGACAACCATCACTTCAAGTGCACATCCGAGGG<br>CGAAGGCAAGCCCTACGAGGGCACCCAGACCATGAGAAATCAAGGTGGTTCGAGGGGGCCCTCTCCCTTCGCTTCGCATCCTGGCTA<br>CTAGCTTCCCTACGGCAGCAAGACCTTCATCAACCCACCCAGGGCATCCCGACTTCTTCAAGCAGTCCCTTCCCTGAGGGCTTCACA<br>TGGGAGAGAGTACCACATACGAAGACGGGGCGTGTGACCGCTACCAGGACACAGCCTCCAGGACGGGTGCCTCATCTACAAGT<br>CAAGATCAGAGGGGTGAACCTCACATCCAACGGCCCTGTGATGCAGAAGAAAACACTCGGCTGGGAGGCTTACCAGAGACGCTGTACC<br>CGCTGACGGCCGGCTGGAAGGCAGAAACGACATGGCCCTGAAGCTCGTGGCGGGAGCCATCTGATCGCAAACATCAAGAACACATAT<br>AGATCCAGAAACCCCGTAAGAACCTCAAGATGCCTGGCGTCTACTATGTGGACTACAGACTGGAAGAATCAAGGAGGCCAACACGA<br>GACCTACGTCGAGCAGCAGGAGTGGCAGTGGCCAGATACTGCGACCTCCCTAGCAAACCTGGGGCACGGATCTGGCCGCCAACCTTCT<br>CTCTGCTGAAGCAGGGCCGGCAGCTGGAGGAGAACCAGGCCATCTAGAATG                                                                                                                                                                                                                                                                                                                                                                                                                                                                                                                                                                                                                                                                                                    |
| Kozak<br>sequence        | GCTGAGCCACC                                                                                                                                                                                                                                                                                                                                                                                                                                                                                                                                                                                                                                                                                                                                                                                                                                                                                                                                                                                                                                                                                                                                                                                                                                                                                                                                                                                                                                                                                                   |
| rb glob PA<br>Terminator | TTCCTCTCAGGTGCAGGCTGCCTATCAGAAGTGGTGGCTGGCCATGCCCTGGCTCACAATACCACTGAGATCTTTTTCC<br>CTCTGCCAAAAATATGGGACATCATGAAGCCCTTGAAGCATCTGACTTCTGGCTAATAAAGGAAATTTATTTTTCATGCAATAGTGT<br>GTTGGAATTTTTTGTGTCTCTACTCGGAAGGACATATGGGAGGGCAATCATTTAAACATCAGAATGAGTATTTGGTTTAGAGTTTC<br>GCAACATATGCCATATGCTGGCTGCCATGAACAAGTGGTGGCTATAAAGAGGTCATCAGTATATGAACAGCCCCCTGCTGTCCATTC<br>CTTATTCATAGAAAAGCCTTGACTTGAAGTTAATTTTTTATATTTTTGTTTGTGTTATTTTTTCTTTAACATCCCTAAAAATTTT<br>CCTTACATGTTTTACTAGCCAGATTTTTCTCTCTCTGACTACTCCAGTCATAGCTGTCCCTCTCTCTTATGAGAT                                                                                                                                                                                                                                                                                                                                                                                                                                                                                                                                                                                                                                                                                                                                                                                                                                                                                                                                                                       |
| AmtR <sup>A</sup>        | ATGGGAGTGCAGGTGGAGACCAFCAGCCAGGAGATGGCAGGACATTCGCCAAGCGGGGACACTTGCCTGGTGCATACACCGGCAT<br>GCTGGAGGACGGGAAGAAAGTGGATAGCTCCAGGGACCGCAACAAGCCCTTCAAGTTCATGCTGGGAAAGCAGGAAGTGTATCCGCGGT<br>GGGAGGAAGGAGTGGCCACAGATGAGTGTGGGGCAGCGGGCTAAACTGACTATTTCACTGACTACCGCTATGGAGCTACCGGCCACCA<br>GGATCATTTCCCTCTCATGCCACCTGGTGTGGATGTGGAGCTGCTGAAGGCAG. AATGGCTGGCGCCGTGGGCAGACCCAGAAGATC<br>TGCTCCTCGGAGAGCCGGCAAGAACCCTGGGAAGAGATCTGGATGCCAGCGCCGAGCTGTTCACAGACAGAGGGCTTTGCCACCACCA<br>GCACCCACAGATTGCCGACGCTGTGGGCATCAGACAGGCCAGCCTGTACTACCACCTCCCCAGCAAGACCGAGATCTCCTGACCCGT<br>CTGAAAAGCAGCCTGGAAACCTCCACCGTGTGGCCGAGGATCTGTCTACCCTGGACGCGCCGAAATGAGACTGTGGGCTATCGT<br>GGCCAGCAAGTGGCGGTGCTGCTGACCCAAAGTGAACCTGGCCGGCTGTACCAGCTGCCTGTGGCTGTAGGAATTCGCGC<br>AGTACCACAGCCAGCGGAGGCCCTGACCAAGTGTTCAGAGATCTGGCCACCGAGATTTGGGGCAGCAGCCAGAGCCGAACTGCC<br>TTCCACATCACCATGAGCGTGTGAGATCGGGCGGAACGACGCTCAAGATCCCTAGCCCTTGAGCGCCGACTCTCTGCCCGAGCAGC<br>CATTATGCTGGCTGACGCCCTCCCTGGCTGTGTGGGAGCCTCTGCTGCCGACAGAGTGAAGAAGGCTGAAACTGATCAAGCAGG<br>CCGACGCCAAGCGCTTAGCACTTAAATTAGCTGGTTGGACATAGGGGGCGCCAGC. GCGCCCTCCACCGATGTGTCCCTGGGAGATGAG<br>CTGCACCTGGACGGCGGAGGACGTGGCAATGGCCATGCCAGCCTCTGGACGACTTCGACCTGGACATGCTGGGCGACGGCGATGCC<br>TGCCCTGGCTTCACACCCACGACTTGCCTTACGGCCCTGGACCTGGCCGACTTCGAGTTCGAGCAGATGTTCCACCGACGCAC<br>TGGCATCGACGAGTACGGCGGA. CCCCCAAGAAAAGCGGAAAGTGTGATGAG                                                                                                                                               |
| ButR <sup>A</sup>        | ATGGGAGTGCAGGTGGAGACCAFCAGCCAGGAGATGGCAGGACATTCGCCAAGCGGGGACACTTGCCTGGTGCATACACCGGCAT<br>GCTGGAGGACGGGAAGAAAGTGGATAGCTCCAGGGACCGCAACAAGCCCTTCAAGTTCATGCTGGGAAAGCAGGAAGTGTATCCGCGGT<br>GGGAGGAAGGAGTGGCCACAGATGAGTGTGGGGCAGCGGGCTAAACTGACTATTTCACTGACTACCGCTATGGAGCTACCGGCCACCA<br>GGATCATTTCCCTCTCATGCCACCTGGTGTGGATGTGGAGCTGCTGAAGGCAG. AATGAGCAAGGCCGCCAAGAGCAGCGGCAAC<br>CTCTCCTGATGCCCTGAGAGCGCCGTGGAATAGAGCCCGCTGACCGCTGAAGATGGCGGAGAGAACTGGCCCTGCCGCAATGG<br>AATGTTCCGACGAAGGGCTACAAGGCCACCACCGTGGATGAGATTGCCGCTGCTGTGGCTGGCCAGACGGACCTTCTCCGGCAC<br>TTCCGGTCCAAGAGGAAGCCATCTTCCCCGACACGACGACACCTGATTAGAGCCGAGGCGCGTGAATGCCGCCCTCCTCACGA<br>ACACCCCTGGATACCGTGTGCCGGGCATCAAGAAGTGTGAAAGATGATGAAAGATGATACGCGCCAGCCCTGCCGTCCGTGGAACCTACAGAC<br>TGACCAGAGAGTGGCCACACTGAGAGAGCGGAGATCGCCTCCGTGGCTAGATACGAGCGGTGTTACCAGATACCTGCTGGGCCAC<br>TTGCAGCAGCAGCCACCACGATGGCAACGACGATCCTCTGCTGGCCGAAGTGGCTGCCCTGCGCTGGTACAGCCACACACCGT<br>GCTGAGAAAGATGGCTGAGAGCCGGCAGCGGACGCTGGAACACAGCTGGATCAGCCCTTCGCCATCTGCGGAGAACCTTCGCA<br>CAGGCATCGGAGCCGGCAGAGATACACTGCCAGCTGCCGACCTGCCACAGTGTCTGCTCAGGGCGAAGTGTCTGTGACCGTGGCAAGA<br>ACCGACGCCCTCTGGACGAAGTCAATCGGACCATCAGAAGGCCCTGCGCGAGAGATCT. CGCTTAGCACTTAAATTAGCTGGTTGGA<br>CATAGGCGGC. GCCAGC. GCGCCCTCCACCGATGTGTCCCTGGGAGATGAGCTGCACCTGGACGGCAGGACCTGGCCCTGACCG<br>ACGCTCTGGACGACTTCGACCTGGACATGCTGGGCGACGGCGATAGCCCTGGCCCTGGCTTCACCCACGACTCTGCCCTTACGGC<br>GCCTGGACATGGCCGACTTCGAGTTCGAGCAGATGTTACCGACGCACCTGGGCATCGACGAGTACGGCGGA. CCCCCAAGAAAAGG<br>CAAAGTGTGATGA |
| IcaR <sup>A</sup>        | ATGGGAGTGCAGGTGGAGACCAFCAGCCAGGAGATGGCAGGACATTCGCCAAGCGGGGACACTTGCCTGGTGCATACACCGGCAT<br>GCTGGAGGACGGGAAGAAAGTGGATAGCTCCAGGGACCGCAACAAGCCCTTCAAGTTCATGCTGGGAAAGCAGGAAGTGTATCCGCGGT<br>GGGAGGAAGGAGTGGCCACAGATGAGTGTGGGGCAGCGGGCTAAACTGACTATTTCACTGACTACCGCTATGGAGCTACCGGCCACCA<br>GGATCATTTCCCTCTCATGCCACCTGGTGTGGATGTGGAGCTGCTGAAGGCAG. AATGAAGGACAAGATCATCGACAACGCCATCAC<br>CCTGTTTCAGCGAGAAGGGCTACGACGGCACACACTGGACGACATCAGCAAGAGCGTGAACATCAAGAAGGCCAGCCGTGACTACCAC<br>ACGACAACAAGAGGAAATCTACCGGAAGTCCGTGAGAACTGCTTCAACTACTTTCATCGACTTTCTGCTGGGAACCCACGACGATAAC<br>TACAGCATCGACGGCTGTACCAGTCTCTGTTCAAGTTTATCTTCGACGTGGACGAGCGGTACATCAAGTGTACGTGCAGCTGAGCAG<br>CGCCCTGAGGCCCTGAACAGCGAGATCAAGCACCATCTGAGGAAATCAACACCACCTGACACGAGGCTGATCAAGTACTACGACC<br>CCACCCACATTTGCTCTGAACAAGAAGATTTTCATCAACTGATCCTGCTGTTCTTGAAACCTGGTACTTCCGGCCAGCTTCTCCAG<br>AAATTCGGCGTGTACGAGGACAGCAAGAACCGGTTCAAGGACAGGTGTACAGCCTGCTGAACGTTCTCTGAAGAAG. CGCTTAGCACT<br>TAAATTAGCTGGTTGGACATAGCGGC. GCCAGC. GCGCCCTCCACCGATGTGTCCCTGGGAGATGAGCTGCACCTGGACGGCGAGGACG<br>TGGCAATGGCCCATGCCGACGCTCTGGACGACTTCGACTGGACATGCTGGGCGACGGCGATAGCCCTGGCCCTGGCTTCACCCACGAC<br>GACTCTGCCCTTACGGCGCCCTGGACATGGCCGACTTCGAGTTCGAGCAGATGTTACCGACGCACCTGGGCATCGACGAGTACGGCGG<br>A. CCCCCAAGAAAAGCGGAAAGTGTGATGA                                                                                                                                                                                                                                       |
| LmrA <sup>A</sup>        | ATGGGAGTGCAGGTGGAGACCAFCAGCCAGGAGATGGCAGGACATTCGCCAAGCGGGGACACTTGCCTGGTGCATACACCGGCAT<br>GCTGGAGGACGGGAAGAAAGTGGATAGCTCCAGGGACCGCAACAAGCCCTTCAAGTTCATGCTGGGAAAGCAGGAAGTGTATCCGCGGT<br>GGGAGGAAGGAGTGGCCACAGATGAGTGTGGGGCAGCGGGCTAAACTGACTATTTCACTGACTACCGCTATGGAGCTACCGGCCACCA<br>GGATCATTTCCCTCTCATGCCACCTGGTGTGGATGTGGAGCTGCTGAAGGCAG. AATGAGTACCGCGACAGCAGAGAGAAGATCCT<br>GAGCGCCGCCACCCGGCTGTTCAGTGCAGGCTACTACGGCACCGCCCTGAACCAGATCATCAAGAGAGCGGAGCCCAAGGGCA<br>GCTGTACTACCATCTCCTGGCGGCAAGAGCAGCTGGCCATCGAGCCGTGAACAGATGAAGGATACATCCCGCAAGAAATCCCG<br>GACTGCATGGAAGCCTGCACCCAGCCCGCAGGGCATTCAGGCTTTCTGAAAGAGCTGAGTGCAGTTCCTCTCCGACCCAGGACAT<br>CGAGGGCTGCTGTGGGACTGCTGGCCCGGACAGCAAGCTGAAGTCCGAGCCCTGAGAGAGGCTGCCACGAGGCTTACAAGAAT<br>GGGCCAGCGTGTACGAGGAAAGCTGCGGACAGCCGCTGACAGCAGAGCAGCAAGAGGCCAGCAGCCCTGCTCAACGCCATGATC<br>GAGGGCCGATCCTGCTGAGCCTGACCGCAAGAACAGCACCCTGCTGCACATCAGCAGCTGCATCCCGCAGCTTCTGAAAGAGAG. GC<br>GTTAGCACTTAAATTAGCTGGTTGGACATAGCGGC. GCCAGC. GCGCCCTCCACCGATGTGTCCCTGGGAGATGAGCTGCACCTGGACG<br>GCGAGGAGTGCAGTGGCCATGGCCATGCCAGCCTCTGGACGACTTCGACTGGACATGCTGGGCGACGGCGATAGCCCTGGCCCTGGCTTC<br>ACACCCACGACTCTGCCCTTACGGCGCCCTGGACATGGCCGACTTCGAGTTCGAGCAGATGTTCCACCGACGCACCTGGGCATCGACGA<br>GTACGGCGGA. CCCCCAAGAAAAGCGGAAAGTGTGATGA                                                                                                                                                                                                                                             |

|                    |                                                                                                                                                                                                                                                                                                                                                                                                                                                                                                                                                                                                                                                                                                                                                                                                                                                                                                                                                                                                                                                                                                                                                                                                                                                                                                                                                                                                     |
|--------------------|-----------------------------------------------------------------------------------------------------------------------------------------------------------------------------------------------------------------------------------------------------------------------------------------------------------------------------------------------------------------------------------------------------------------------------------------------------------------------------------------------------------------------------------------------------------------------------------------------------------------------------------------------------------------------------------------------------------------------------------------------------------------------------------------------------------------------------------------------------------------------------------------------------------------------------------------------------------------------------------------------------------------------------------------------------------------------------------------------------------------------------------------------------------------------------------------------------------------------------------------------------------------------------------------------------------------------------------------------------------------------------------------------------|
| McbR <sup>A</sup>  | <p>ATGGGAGTGCAGGTGGAGACCAFCAGCCAGGAGATGGCAGGACATTCGCCAAGCGGGGAGACTTGGCTGGTGCATACACCGGCAT<br/> GCTGGAGGACGGGAAGAAAGTGGATAGCTCCAGGGACCGCAACAAGCCCTCAAGTTCATGCTGGGAAAGCAGGAAGTGATCCGCGGGT<br/> GGGAGGAAGGATGGCCACAGTAGAGTGTGGGCGAGCGGGCTAAACTGACTATTTCACTGACTACCGCTATGGAGCTACCGGCCACCA<br/> GGATCAATCCCGCTCAFGCCACCCCTGGTGTTCGATGTGGAGCTGCTGAAGCCAGAAATGGCCCGCCAGCGCCAGCGCAAGAGCAAAAC<br/> AAGCGCTGGCGCCAACCGCGGGAGAAACAGACCCAGCCCTAGACAGAGACTGCTGGACAGCGCCCAACCTGTTACCACCCGAGGGCA<br/> TCAGAGTGATCCGCATCGACCGGATCCTGGCGGAGGCGATGTGGCCAAAGCCAGCCTGTACAGCCTGTTCCGCGAGAAAGGATGCCCTC<br/> GTGATCGCTACTTGGAAAACCTGGACAGCTGTGGCGCAAGCCCTGGCGGAAAGAACCTGGGCATGAAGGACCCCGAGGACAAGAT<br/> TATCGCCTTCTTCGACCAGTGCATCGAGGAAGAACCAGGAGGACTTCCGGGGCAGCCACTTCCAGAACCGCCCTCCGAGTACCCCA<br/> GACCCGAACCCGATAGCGAGAAGGGCATTTGTGGCCGCGCTGCTGGAACACAGAGAGTGGTGCACAAGACCCCTACCGACCTGCTGACC<br/> GAGAAGACCGGTACCCTGGCACCCACAGGCCACACAGCTGCTGGTGTTCGATGGCGCCTGGCCGGCAGCAGACTGTTGCACAA<br/> TATCAGCCCCCTGAAACCGCAGAGATCTGGCCAGACAGTGTCTCTGCCCCCCCTGCCACTACTCTATCCGTTAGCACTTAAAT<br/> TAGCTGGTTTGGACATAGGCCGGGCCAGC GCCCCTCCCACCGATGTGTCCCTGGGAGATGAGCTGCACCTGGACGGCGAGGACGTGGCA<br/> ATGGCCATTCGCGACGCTTGGACGACTTGCACCTGGACATGCTGGCGCAGCGGATAGCCCTGGCCCTGGCTTCACACCCACGACTC<br/> TGCCCTTACGGCGCCCTGGACATGGCCGACTTCGAGTTCGAGCAGATGTTACCCGACGCACTGGGCATCGACGAGTACGGCGGA<br/> CCCAAGAAAAGCGGAAAGTGTGATGA</p>                    |
| PhIF <sup>A</sup>  | <p>ATGGGAGTGCAGGTGGAGACCAFCAGCCAGGAGATGGCAGGACATTCGCCAAGCGGGGAGACTTGGCTGGTGCATACACCGGCAT<br/> GCTGGAGGACGGGAAGAAAGTGGATAGCTCCAGGGACCGCAACAAGCCCTCAAGTTCATGCTGGGAAAGCAGGAAGTGATCCGCGGGT<br/> GGGAGGAAGGATGGCCACAGTAGAGTGTGGGCGAGCGGGCTAAACTGACTATTTCACTGACTACCGCTATGGAGCTACCGGCCACCA<br/> GGATCAATCCCGCTCAFGCCACCCCTGGTGTTCGATGTGGAGCTGCTGAAGCCAGAAATGGCCCGCCAGCGCCAGCGCAAGAGCAAAAC<br/> AATGGCCCGCCAGCGCCAGCGCAAGAGCAGCATCGG<br/> ATCTCTGAGAAGCCCCACACCCACAAGGCCATCCTGACCAGCACCATCGAGATCCTGAAAGAGTGGCGCTACAGCGCCTGAGCATCG<br/> AGTCTGTGGCTAGAAGGCTGGCGCCTCCAAGCCACCATCTACCGGTGGTGGACAACAAGCCGCTGTGTCGCGAGGTGTACGAG<br/> AACGAGAGCGAGCAGGTCCGAAAGTTCGCCGACTGGCGAGCTTAAAGCCGATCTGGACTTCTGCTGGGAACCTGTGAAAGTGTG<br/> CGGGAAACCACTGTCGGCGAGGCCCTCAGATGCGTGTGCTGAGGCCAGCTGGACCCCTGCCACTGACCCAGCTGAAGGACCACT<br/> TCATGGAAACGGCGGAGAGAGATGCCAAGAAAATGGTGGAAAACCCATCAGCAACCGCGAGCTGCCAACCGGACCAACCCGGAACTG<br/> CTGCTGGATATGATCTTCCGCTTCTGCTGGTACAGACTGCTGACCGAGCAGCTGACCGTGGAAACAGGATATCGAGGAATTCACCTTTCT<br/> GCTGATCAACGGCGTGTGCCCGGCACCCAGAGA GCGTTAGCACTTAAATTAGCTGGTTTGGACATAGGCCGGGCCAGC GCCCCTCCC<br/> CCGATGTGTCCCTGGGAGATGAGCTGCACCTGGACGGCGAGGACTGGCAATGGCCATGCCGACGCTTGGACCTTCGACCTGGAC<br/> ATGCTGGCGCAGCGCGATAGCCCTGGCCCTGGCTTCACACCCACGACTCTGCCCTTACGGCGCCCTGGACATGGCCGACTTCGAGTT<br/> CGAGCAGATGTTACCCGACGCACTGGGCATCGACGATACCGCCGA CCCCAAGAAAAGCGGAAAGTGTGATGA</p>                        |
| QacR <sup>A</sup>  | <p>ATGGGAGTGCAGGTGGAGACCAFCAGCCAGGAGATGGCAGGACATTCGCCAAGCGGGGAGACTTGGCTGGTGCATACACCGGCAT<br/> GCTGGAGGACGGGAAGAAAGTGGATAGCTCCAGGGACCGCAACAAGCCCTCAAGTTCATGCTGGGAAAGCAGGAAGTGATCCGCGGGT<br/> GGGAGGAAGGATGGCCACAGTAGAGTGTGGGCGAGCGGGCTAAACTGACTATTTCACTGACTACCGCTATGGAGCTACCGGCCACCA<br/> GGATCAATCCCGCTCAFGCCACCCCTGGTGTTCGATGTGGAGCTGCTGAAGCCAGAAATGGCCCGCCAGCGCCAGCGCAAGAGCAAAAC<br/> AATGAACTGAAGGACAAGATCCTGGCGTGGC<br/> CAAAGAGCTGTTTCATCAAGAAGCCGTACAACGCCACCACCACCGCGAGATCGTGAAGCTGAGCGAGAGCAGCAAGGGCAACCTGTACT<br/> ACCATCAAGACCAAAAGAGAACCTGTTCTCGAGATCCTGAAACATCGAGGAATCCAAGTGGCAGGAACAGTGGAAAAAAGAACAGATC<br/> AAGTGCAGAACAAACCGGAGAGATTTACCTGTACAAACAGCTGAGCCTGACCCAGGACTACTACCCCTGACCCAGGACCCATCAT<br/> CGAGTTCTACACAGACTACTATAAGACCAACAGCATCAACGAGAAGATGAACAGCTCGAGAACAAGTACATCGACGCTTACCAGCTGA<br/> TCTTCAAAGAGGCAATCTGAACGGCGAGTGGTGCATCAATGACGTGAACCGCGTGTCCAAGATCGCCGCAATGCCGTAATGGCATC<br/> GTGACCTTACCCACGAGCAGAACATTAACGAGCGGATCAAGCTCATGAAACAATTCAGCCGATCTTCTGAAACGGCTGAGCAAGC<br/> GTTAGCACTTAAATTAGCTGGTTTGGACATAGGCCGGGCCAGC GCCCCTCCCACCGATGTGTCCCTGGGAGATGAGCTGCACCTGGACG<br/> CGGAGGACGTGGCAATGGCCATGGCCGACTTGGACGACTTCGACTGGACATGCTGGCGCAGCGCGATAGCCCTGGCCCTGGCTTC<br/> ACACCCACGACTCTGCCCTTACGGCGCCCTGGACATGGCCGACTTCGAGTTCGAGCTCGAGCAGATGTTACCCGACGCACTGGGCATCGAC<br/> GTACGGCGGA CCCCAAGAAAAGCGGAAAGTGTGATGA</p>                                                    |
| TetR <sup>A</sup>  | <p>ATGGGAGTGCAGGTGGAGACCAFCAGCCAGGAGATGGCAGGACATTCGCCAAGCGGGGAGACTTGGCTGGTGCATACACCGGCAT<br/> GCTGGAGGACGGGAAGAAAGTGGATAGCTCCAGGGACCGCAACAAGCCCTCAAGTTCATGCTGGGAAAGCAGGAAGTGATCCGCGGGT<br/> GGGAGGAAGGATGGCCACAGTAGAGTGTGGGCGAGCGGGCTAAACTGACTATTTCACTGACTACCGCTATGGAGCTACCGGCCACCA<br/> GGATCAATCCCGCTCAFGCCACCCCTGGTGTTCGATGTGGAGCTGCTGAAGCCAGAAATGGCCCGCCAGCGCCAGCGCAAGAGCAAAAC<br/> AATGAGCCCGCTGGACAAGAGCAAACTGATCAA<br/> CAGCGCCTGGAACTGCTCAACGAAGTGGCATCGAGGCTGACCCAGCTGACCCGGAAGCTGGCTCAGAAGTGGCGTGAACAGCCACCC<br/> TGTACTGGCAGTGAAGAACAAGAGACCCCTGCTGGACGCCCTGGCCATCGAGATGCTGGACCGGCACCCACCCACTTTTGGCCCCTG<br/> GAAGCGGAGAGCTGGCAGGATTTCTCGGGAACAACGCCAAGAGCTTCAGATGGCGCTGCTGCTGCCACCAAGGATGGCGCCAAAGTGA<br/> CCTGGGACAGACTACCGAGAAGCAGTACGAGACTGGAAGAACAGCTGGCCCTTCTGTGCCAGCAGGCTTCCGCTGGAAAAATG<br/> CCCTGTACGCCCTGAGCGCCGTGGGCCACTTTACACTGGCTGCGTGTGGAAGATCAGGAACACCAGGTGCGCAAAGAGGAAAGAGAG<br/> ACACCCACCCGACAGCATGCCCTCTGCTGAGACAGCCATGAGCTGTTGATCATCAGGGCGCCAGCCGCTTTCTGTTCCG<br/> CCTCGACTGATCATCTGTGGCTCGAAAAACAGTGAAGTGCAGATCCGGCAGC GCGTTAGCACTTAAATTAGCTGGTTTGGACATAG<br/> GCGGCCGCCAGC GCCCCTCCCACCGATGTGTCCCTGGGAGATGAGCTGCACCTGGACGGCGAGGACGTGGCAATGGCCATGGCAGCCT<br/> CTGGACGACTTCGACCTGGACATGCTGGCGCAGCGGATAGCCCTGGCCCTGGCTTCACACCCACGACTTCGCCCTTACGGCGCCCT<br/> GGACATGGCCGACTTCGAGTTCGAGCAGATGTTACCCGACGCACTGGGCATCGACGAGTACGGCGGA CCCCAAGAAAAGCGGAAAG<br/> TGTGATGA</p> |
| AmtR <sup>R</sup>  | <p>ATGGCTGGCCGCTGGGCGAGACTAGAAGATCGCCCTCGGAGAGCGGGCAAGAACCCAGAGAAGAGATCCTGGATGCCAGCGCGCA<br/> GCTGTTACCAGACAGGCTTTGCCACCACAGCACCAGGATGGCCAGCTGTGGGCATCAGACAGGCGAGCTGTACTACCCT<br/> TCCCCAGCAAGACCGAGATCTTCTGACCCCTGCTGAAGTCCACCGTGGAAACCAGCACCCTGCTGGCCGAGGATCTGTCTACACTGGAC<br/> CGCCGACCCGAGATGAGACTGTGGGCCATCGTGGCCCTGAAAGTGGCGCTGCTGCTGAGCACAAGTGGAAAGCTGGCCGCGGTGTACCA<br/> GCTGCCATTCGTGGGCTCCGAGGAATTCGCCGAGTACCACAGCCAGCGGAGGCGCCCTGACCAACAGTGTTCAGAGATCTGGCCACGAGA<br/> TTGTGGGCGACGACCTAGAGCCGAAGTCCCTTCCACATCACCATGAGCGTGTGAGATGCGGCGGAACGACGGCAAGATCCCTAGC<br/> CCTCTGAGCGCGGACTCTCTGCCGAGACGCCATCATGCTGGCTGATGCTAGCCTGGCTGTGCTGGAGCCCTCTGCTGCCGACAG<br/> AGTGGAAAAGACCCCTGGAATGATCAAGCAGGCGGACGCCAAGGCCAGC CCCCAAGAAAAGCGGAAAGTGTGATGA</p>                                                                                                                                                                                                                                                                                                                                                                                                                                                                                                                                                                                                                                             |
| BM3R1 <sup>R</sup> | <p>ATGAAAAGCACCCCAACAGCAGAAGGCCATCTTACGCGCCAGCCTGCTGCTGTTGCGCGAGAGAGGCTTTGACGCCACCACCATGCC<br/> CATGATTCGCGAGAAGCCAAAGTGGGAGCCCGCCACCATCTACCGTACTTCAAGAACAAGAGAGCCTGGTCAACAGACTGTTCGAG<br/> AGCAGCTGAACAGTTTCTGCGAGTGCATCGAGAGCGCCTGGCCATGAGAGGGACCGCTACAGATGGCTTCCACACATCTTCGAG<br/> GGCATGGTCACTTACCAAGAACCACCCAGAGCCCTGGGCTTCAACAAGACCCACAGCCAGGGCACCCTTCTGACCCGAGAAAAGCCG<br/> CTGGCCATACGAAACTGGTGGAAATTCGTGTGACCTTCTTCAGAGAGGGCCAGAAACAGGGCGTATCCGGAACCTGCCGAGAAATG<br/> CCCTGATCGCCATCTCTGCGGAGCTTCACTGGAAGTGTACGAGATGATCGAGAAGCAGTACTGAGCCTGACCCGAGCTGACCGAGCTGACTGACC<br/> GGCGTGGAAAGATCTCTGTGGGCGCTCTGAGCAGACAGAGCGCCAGC CCCCAAGAAAAGCGGAAAGTGTGATGA</p>                                                                                                                                                                                                                                                                                                                                                                                                                                                                                                                                                                                                                                                                                                                                 |
| LmrR <sup>R</sup>  | <p>ATGAGCTACGGCGACAGCAGAGAGAAGATCCTGAGCGCCGCCACCCGCTGTTCCAGCTGCAGGCTACTACGGCACCAGCCGCTGAACCA<br/> GATCATCAAAGAGAGCGGAGCCCAAGGCGAGCTGTACTACCATCTCCCTGGCGCAAAGAGCAGCTGGCCATCGAGCCGCTGAACCA<br/> AGATGAAGGATACATCCGGCAGAAAATCGCCGACTGCTACGAAAGCTGACCCGACCCCGCGAGGCGTACAGCCCTTTCTGAAAGAG<br/> CTGAGCTGCCAGTCTCTGACCCGAGGACATCGAGGCGCTGCTGTGGAGTGTGCGGCGCGAGACAAGCTGAAGTCCGAGCCCT<br/> GAGAGAGGCTGCCACGAGCCCTACAAGAATGGCCAGCGTGTACGAGGAAAAGCTGGCGCAGACCAGCTGACGCGAGAGCAGAGCCA<br/> AAGAGCCAGCACCTGCTAACGCCATGATCGAGGCGGCATCTGCTGAGCCTGACCCGCAAGAACAGCACCCCTGCTGCACATC<br/> AGCAGCTGCATCCCCGACTGCTGAAGAGAGCCAGC CCCCAAGAAAAGCGGAAAGTGTGATGA</p>                                                                                                                                                                                                                                                                                                                                                                                                                                                                                                                                                                                                                                                                                                                                                           |

|                     |                                                                                                                                                                                                                                                                                                                                                                                                                                                                                                                                                                                                                                                                                                                                |
|---------------------|--------------------------------------------------------------------------------------------------------------------------------------------------------------------------------------------------------------------------------------------------------------------------------------------------------------------------------------------------------------------------------------------------------------------------------------------------------------------------------------------------------------------------------------------------------------------------------------------------------------------------------------------------------------------------------------------------------------------------------|
| McbR <sup>R</sup>   | ATGGCCGCCAGCGCCTCTGGCAAGTCTAAGACCAGCGCTGGCGCCAACCGGGCGGAGAAACAGACCCAGCCCTAGACAGAGACTGCTGGA<br>CAGCGCCACCAACCTGTTACACCACCGAGGGCATCAGAGTGTATCGGCATCGACCCGGATCCTGCGCGAGGGCCGATGTGGCCAAGGCCAGCC<br>TGTACAGCCTGTTCGGCAGCAAGGATGCCCTCGTGTATCGCCTACCTGGAAAACCTGGACCAGCTGTGGCCGGAAGCCTGGCCGAGAGA<br>ACCGTGGGCATGAAGGACCCCGAGGACAAGATTATCGCCTTCTCGACCAGTGCATCGAGGAGAACCAGGAAAGACTTCCGGGGCAG<br>CCACTCCAGAACCGCCGCTCCGAGTACCCAGACCCGAAACCCGATAGCGAGAAGGGCATTGTGGCCCGCTGTGGAAACACAGAGAGT<br>GGTGCCACAAGACCCTGACCGACCTGTGACCGAGAAGAACCGGCTACCCCTGGCACCACCCAGGCCAACCCAGCTGCTGGTGTTCGGAT<br>GGCGGCTGGCCGGCAGCAGACTGGTGCACAATATAGCCCTGGAAACCGCCAGGGACCTGGCCAGACAGCTGCTCTGCCCCC<br>TGCCGACTACTCTATCGCCAGC <b>CCCCCAAGAAAAAGCGGAAAGT</b> GTATGA |
| PhiF <sup>R</sup>   | ATGGCCCGGACCCCTCTAGAAGCTCTATCGGCAGCCTGAGAACCCCAACCCCAAGGCCATCCTGACCAGCACCATCGAGATCCT<br>GAAAGAGTGGCGCTACAGCGCCTGAGCATCGAGTCTGTGGTAGAAGGGCTGGCGCTCCAAGCCACCATCTACCGGTGTTGGACAA<br>ACAAGGCCCGCCTGATCGCCGAGGTGTACGAGAACGAGAGCGAGCAGGTCCGAAAGTTCCCCGACCTGGGCGAGCTTCAAGGCCGATCTG<br>GACTTCCGTGCTCGGAACCTGTGAAAGTGTGGCGGAAACCATCTGCGCCGAGCCCTCAGATCGGTGATCGCTGAGGCCAGCTGGA<br>CCCTGCCACCCTGACACAGCTGAAGGACCAGTTCATGGAACGGCGGAGAGAGATGCCAAGAACTGGTGGAAAACGCCATCAGCAACG<br>GGGAGCTGCCAAAGGACACCAACCGGAACTGCTGCTGGATATGATCTTCGGCTTCTGCTGGTACAGACTGCTGACCGAGCAGCTGACC<br>GTGGAACAGGATATCGAGGAATTCACCTTTCTGCTGATCAACGGCGTGTGCCCGCACCCAGAGAGCCAGT <b>CCCCCAAGAAAAAGCG<br/>GAAAGT</b> GTATGA                                                |
| QacR <sup>R</sup>   | ATGAACCTGAAGGACAAGATCCTGGGCGTGGCCAAAGAGCTGTTCATCAAGAACGGGTACAACGCCACCACCACCGGGCAGATCGTAA<br>GCTGGCCGAGCAGCAAGGCCAACCTGACCTTACCCTTACCAAGGAAAGAACCTGTTCCCTCGAGATCCTGAACATCGAGGAATCCA<br>AGTGGCAGAACAGTGGAGAAAGAACAGATCAAGTGAAGAACACCGCGAGAAGTCTACCTGTACAACGAGCTGAGCCTGACCACC<br>GAGTACTACTACCCCTGCGAAGCCATCAGGATTTCTACACAGAGTACTATAAGACCAACAGCATCAACGAGAAGATGAACAAGT<br>CGAAGAACAGTACATCGACGCTACCGTGTCTTCAAGAGGGCAATCTGAACGGCGAGTGGTGCATCAATGACCTGAACCGCGTGT<br>CCAGATCGCCGCAATGCCGTGAATGGCATCGTACCTTACCACGAGCAGAACATTACGAGCGGATCAAGCTCATGAACAAATTC<br>AGCCAGATCTTCTGAACGGGCTGAGCAAGGCCAGC <b>CCCCCAAGAAAAAGCGGAAAGT</b> GTATGA                                                                                                  |
| TetR <sup>R</sup>   | ATGAGCCGGCTGGACAAGAGCAAGATGATCAACAGCGCCCTGGAACCTGTGAACGAAAGTGGCCTCAGAGGCTGACCGCCGGAAGCT<br>GGCTCAGAACTGGGCGTGGAAACAGCCACCCTGTACTGGCACGTGAAGAACAAGAGAGCCCTGCTGGACGCCCTGGCCATCGAGATGC<br>TGGACCGGCACACACCCTTTTGGCCCTGGAAGGGCAGAGCTGGCAGGACTTCTGCGGAACAACGCCAAGAGCTTCAGATCGCCT<br>CTGCTGTCCACCGGGATGGCCCAAGTGCACCTGGGCACAGACACTCAGCAGAGTACGAGACAGTCAAGAACCCAGCTGGCCCT<br>CCTGTGCCAGCAGGGCTTACGCTGGAAAATGCCCTGTACGCCCTGAGCGCCGTGGCCACTTTACTGCGGTGCTGCTGGAAGATC<br>AGGAACACCAGGTTCGCCAAAGAGGAAAGAGAGACACCACCACGACAGCATGCCCCCTCTGCTGAGACAGGCCATTGAGCTGTTCCGAT<br>CATCAGGGCGCCGAGCCGCTTCTTCTGCTGCTGAGCTGATCATCTGTGGCCTCGAAAACAGCTGAAGTGGCAGTCCGGCAGCGC<br>CAGC <b>CCCCCAAGAAAAAGCGGAAAGT</b> GTATGA                                   |
| pAmtR <sup>A</sup>  | TTCATCGATCTATAGATAATGATTTCTATCGATCTATAGATAATCATTTCATCGATCTATAGATAATCATTTCATCGATCTATAGA<br>TAATGTTTCTATCGATCTATAGATAATGATTTCTATCGATCTATAGATAATCGGGTCTCAGTAGCT <b>AGGCGTGTACGGTGGGAGGCC<br/>TATATAAGCAGAGCTCGTTAGTGAACCGTCAGAT</b> CGGGTCTCGGAATTCGAC                                                                                                                                                                                                                                                                                                                                                                                                                                                                            |
| pButR <sup>A</sup>  | GTGCTACTTTGACAGCAGTGTACGAGTGTCACTTTGACAGGAGTGTCACTTTCAGTGTCACTTTGACAGCAGTGTCACTTTCAGT<br>ACAGAGTGTCACTGTGTCACTTTGACAGCAGTGTCACTTTCAGTGTCACTTTGACAGCAGTGTCACTTTCAGTGTCACTTTCAGT<br><b>ACGGTGGGAGGCCATATAAGCAGAGCTCGTTAGTGAACCGTCAGAT</b> CGGGTCTCGGAATTCGAC                                                                                                                                                                                                                                                                                                                                                                                                                                                                     |
| pIcaR <sup>A</sup>  | TTCACCTACCTTTTCGTTAGTTAGTTGTGATTCACCTACCTTTTCGTTAGTTAGTTGTCACTTTCAGTGTCACTTTCGTTAGTTAGTT<br>GTCACTTTCACCTACCTTTTCGTTAGTTAGTTGTGTTTTCACCTACCTTTTCGTTAGTTAGTTGTCACTTTCAGTGTCACTTTCGTTAGTTA<br>GGTTGTCgggttcagctagct <b>AGGCGTGTACGGTGGGAGGCCATATAAGCAGAGCTCGTTAGTGAACCGTCAGAT</b> CGGGTCTCGGA<br>ATTCGAC                                                                                                                                                                                                                                                                                                                                                                                                                         |
| pLmrA <sup>A</sup>  | GATAATAGACCAGTCACTATATTTGAGATAATAGACCAGTCACTATATTTTCAGATAATAGACCAGTCACTATATTTTCAGATAATAGACC<br>AGTCACTATATTTGAGATAATAGACCAGTCACTATATTTGAGATAATAGACCAGTCACTATATTTTCGGGTCTCAGTAGCT <b>AGGCGTGT<br/>ACGGTGGGAGGCCATATAAGCAGAGCTCGTTAGTGAACCGTCAGAT</b> CGGGTCTCGGAATTCGAC                                                                                                                                                                                                                                                                                                                                                                                                                                                         |
| pMcbR <sup>A</sup>  | ATAGACTGGCCTGTCTAGAATAGACTGGCCTGTCTACAATAGACTGGCCTGTCTACAATAGACTGGCCTGTCTAGTATAGACTGGCCTG<br>TCTAAGATAGACTGGCCTGTCTACGGTCTCAGCTAGCT <b>AGGCGTGTACGGTGGGAGGCCATATAAGCAGAGCTCGTTAGTGAACCG<br/>TCAGAT</b> CGGGTCTCGGAATTCGAC                                                                                                                                                                                                                                                                                                                                                                                                                                                                                                      |
| pPhiF <sup>A</sup>  | ATGATACGAAACGTACCGTATCGTTAAGGTGAATGATCAAGAACCTACCGTATCGTTAAGGTCAATGATACGAAACGTACCGTATCGTT<br>AAGGTCAATGATACGAAACGTACCGTATCGTTAAGGTGATAGATACGAAACGTACCGTATCGTTAAGGTGATGATACGAAACGTACCG<br>TATCGTTAAGGTGGGTCAGTAGCT <b>AGGCGTGTACGGTGGGAGGCCATATAAGCAGAGCTCGTTAGTGAACCGTCAGAT</b> CGGGT<br>CTCGGAATTCGAC                                                                                                                                                                                                                                                                                                                                                                                                                         |
| pQacR <sup>A</sup>  | TATAGACCGTGGCAGTCCGTCTATAGATAATAGACCAGTGGCAGTCCGTCTATACATATAGACCAGTGGCAGTCCGTCTATACATATAGACCAGT<br>CGATCGGTCTATAGTTATAGACCAGTGGCAGTCCGTCTATAGATAATAGACCAGTGGCAGTCCGTCTATACAGGGTCTCAGTAGCT <b>AGGCGTGT<br/>ACGGTGGGAGGCCATATAAGCAGAGCTCGTTAGTGAACCGTCAGAT</b> CGGGTCTCGGAATTCGAC                                                                                                                                                                                                                                                                                                                                                                                                                                                |
| pTetR <sup>A</sup>  | ACTCTATCATTGATAGAGTGAACCTCTCATTGATAGAGTCAACTCTATCGTATGATAGAGTCAACTCTATCATTGATAGAGTGTACTCT<br>ATCATTGATAGAGTGAACCTCTCATTGATAGAGTGGGTCAGTAGCT <b>AGGCGTGTACGGTGGGAGGCCATATAAGCAGAGCTCG<br/>TTAGTGAACCGTCAGAT</b> CGGGTCTCGGAATTCGAC                                                                                                                                                                                                                                                                                                                                                                                                                                                                                              |
| pAmtR <sup>R</sup>  | CGGAGTACTGTCTCCGAGCGGAGTACTGTCTCCGAGCGGAGTACTGTCTCCGAGCGGAGTACTGTCTCCGAGCGGAGTACTGTCTCC<br>TCCGGTCTCAGTAGCTTTCTATCGATCTATAGATAATACGCCGAT <b>AGGCGTGTACGGTGGGAGGCCATATAAGCAGAGCTCGTT<br/>AGTGAACCGTCAGAT</b> CGCGACACTTCTATCGATCTATAGATAATGGGTCGGAATTCGAC                                                                                                                                                                                                                                                                                                                                                                                                                                                                       |
| pBM3R1 <sup>R</sup> | CGGAGTACTGTCTCCGAGCGGAGTACTGTCTCCGAGCGGAGTACTGTCTCCGAGCGGAGTACTGTCTCCGAGCGGAGTACTGTCTCC<br>TCCGGTCTCAGTAGCTCGGAATGAACGTTTATTCCGACCGGAT <b>AGGCGTGTACGGTGGGAGGCCATATAAGCAGAGCTCGTTAG<br/>TGAACCGTCAGAT</b> CGCGACACCGGAATGAACGTTTATTCCGGGTCGGAATTCGAC                                                                                                                                                                                                                                                                                                                                                                                                                                                                           |
| pLmrA <sup>R</sup>  | CGGAGTACTGTCTCCGAGCGGAGTACTGTCTCCGAGCGGAGTACTGTCTCCGAGCGGAGTACTGTCTCCGAGCGGAGTACTGTCTCC<br>TCCGGTCTCAGTAGCTGATAATAGACCAGTCACTATATTTACCGCGAT <b>AGGCGTGTACGGTGGGAGGCCATATAAGCAGAGCTCGT<br/>TTAGTGAACCGTCAGAT</b> CGCGACACGATAATAGACCAGTCACTATATTTGGTCTCGGAATTCGAC                                                                                                                                                                                                                                                                                                                                                                                                                                                               |
| pMcbR <sup>R</sup>  | CGGAGTACTGTCTCCGAGCGGAGTACTGTCTCCGAGCGGAGTACTGTCTCCGAGCGGAGTACTGTCTCCGAGCGGAGTACTGTCTCC<br>TCCGGTCTCAGTAGCTATAGACTGGCCTGTCTAACGCCGAT <b>AGGCGTGTACGGTGGGAGGCCATATAAGCAGAGCTCGTTAGTGA<br/>ACCGTCAGAT</b> CGCGACACATAGACTGGCCTGTCTAGGTCTCGGAATTCGAC                                                                                                                                                                                                                                                                                                                                                                                                                                                                              |
| pPhiF <sup>R</sup>  | CGGAGTACTGTCTCCGAGCGGAGTACTGTCTCCGAGCGGAGTACTGTCTCCGAGCGGAGTACTGTCTCCGAGCGGAGTACTGTCTCC<br>TCCGGTCTCAGTAGCTATGATACGAAACGTACCGTATCGTTAAGGTACCGCGAT <b>AGGCGTGTACGGTGGGAGGCCATATAAGCAGA<br/>GCTCGTTAGTGAACCGTCAGAT</b> CGCGACACATGATACGAAACGTACCGTATCGTTAAGT                                                                                                                                                                                                                                                                                                                                                                                                                                                                     |
| pQacR <sup>R</sup>  | CGGAGTACTGTCTCCGAGCGGAGTACTGTCTCCGAGCGGAGTACTGTCTCCGAGCGGAGTACTGTCTCCGAGCGGAGTACTGTCTCC<br>TCCGGTCTCAGTAGCTATAGACTGGCCTGTCTAACGCCGAT <b>AGGCGTGTACGGTGGGAGGCCATATAAGCAGAGCTCGT<br/>TTAGTGAACCGTCAGAT</b> CGCGACACTATAGACCAGTGGCAGTCCGTCTATAGGTCTCGGAATTCGAC                                                                                                                                                                                                                                                                                                                                                                                                                                                                    |
| pTetR <sup>R</sup>  | CGGAGTACTGTCTCCGAGCGGAGTACTGTCTCCGAGCGGAGTACTGTCTCCGAGCGGAGTACTGTCTCCGAGCGGAGTACTGTCTCC<br>TCCGGTCTCAGTAGCTACTCTATCATTGATAGAGTACCGCGAT <b>AGGCGTGTACGGTGGGAGGCCATATAAGCAGAGCTCGTTAGT<br/>GAACCGTCAGAT</b> CGCGACACTCTATCATTGATAGAGTGGTCTCGGAATTCGAC                                                                                                                                                                                                                                                                                                                                                                                                                                                                            |
